# Supplementary material for: Discovery and Characterization of a Cryptic Secondary Binding Site in the Molecular Chaperone HSP70
Source: MDPI journal article supplement (doi:10.3390/molecules27030817), 2022-01-26
Supplement: s1 [file s1]

# Discovery and characterization of a cryptic secondary binding site in the molecular chaperone HSP70

Suzanne O'Connor <sup>1</sup>, Yann-Vai Le Bihan <sup>1</sup>, Isaac M. Westwood <sup>1</sup>, Manchin Liu <sup>1</sup>, Oi Wei Mak <sup>3</sup>, Gabriel Zazeri <sup>4,5</sup>, Ana Povinelli <sup>4,5</sup>, Alan M. Jones <sup>4</sup>, Rob van Montfort <sup>1</sup>, Jóhannes Reynisson <sup>2</sup> and Ian Collins <sup>1,\*</sup>

<sup>1</sup> Cancer Research UK Cancer Therapeutics Unit, The Institute of Cancer Research, London, SM2 5NG, UK

<sup>2</sup> School of Pharmacy and Bioengineering, Keele University, Keele, ST5 5BG, UK

<sup>3</sup> Department of Biochemistry, Albert Einstein College of Medicine, Bronx, NY 10461, USA

<sup>4</sup> Institute of Clinical Sciences, University of Birmingham, Edgbaston, Birmingham, B15 2TT, UK

<sup>5</sup> Departamento de Física, Instituto de Biociências, Letras e Ciências Exatas (IBILCE), UNESP, Rua Cristovão Colombo 2265, 15054-000 São José do Rio Preto, Brazil

\* Correspondence: ian.collins@icr.ac.uk

## Supplementary Materials

Figure S1: HSP70 ATP binding site structures.

Figure S2: ATP interactions with HSP70.

Figure S3: ATP site structure in S275W HSC70.

Figure S4: Binding of **3** to HSP72-NBD.

Figure S5: Protein structural changes during ligand pulling MD simulation.

Figure S6: Validation of HSP70 docking protocol.

Figure S7: SPR profiles of vHTS hits binding HSC70-NBD.

Figure S8: The docked pose of compound **4** in the cryptic pocket of HSP70 as predicted by the ASP scoring function.

Figure S9: The docked pose of compound **5** in the cryptic pocket of HSP70 as predicted by the ASP scoring function.

Figure S10: The docked pose of compound **6** in the cryptic pocket of HSP70 as predicted by the ASP scoring function.

Figure S11: The docked pose of compound **7** in the cryptic pocket of HSP70 as predicted by the ASP scoring function.

Figure S12: The docked pose of compound **8** in the cryptic pocket of HSP70 as predicted by the ASP scoring function.

Figure S13: <sup>1</sup>H and <sup>13</sup>C NMR spectra for compounds **1**, **2** and **3**.

Figure S14: LC-MS spectra for compounds **1** – **8**.

Figure S15: Sequence alignment of the nucleotide binding domains of human HSP72 and HSC70 proteins.

Figure S16: Determination of buffer solubility of **1** by quantitative NMR.

Table S1: Observed changes in NMR signal intensities for **3** on addition of HSP72-NBD and ATP.

Table S2: LC-MS data to confirm the identity and purity of vHTS hits **4** – **8**.

Table S3: Crystallographic data collection and refinement statistics for **1**-HSP72-NBD.

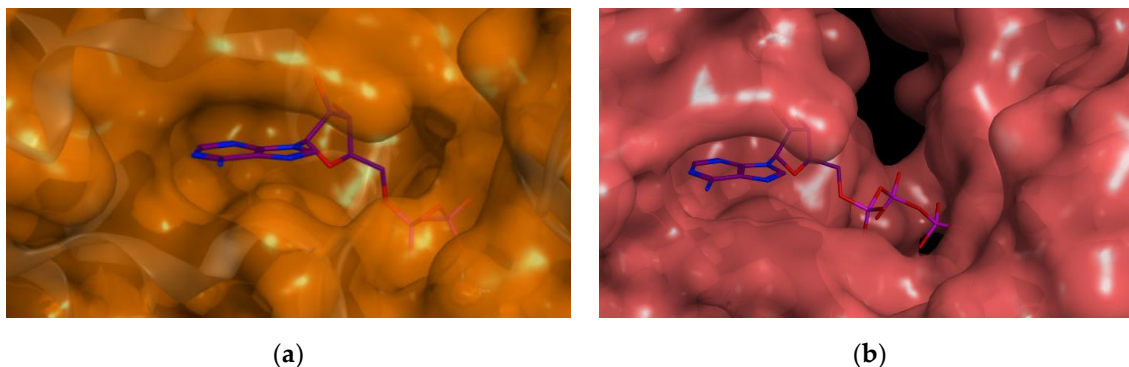

**Supplementary Figure S1.** HSP70 ATP binding site structures. The HSP70 ATP-binding site is highly flexible with the size and shape dependent on nucleotide binding and association with nucleotide exchange factors such as Bag1. **(a)** Structure of HSC70-NBD in complex with ADP (PDB ID: 4H5T). **(b)** Structure of HSC70/Bag1 in complex with ATP (PDB ID: 2KHO).

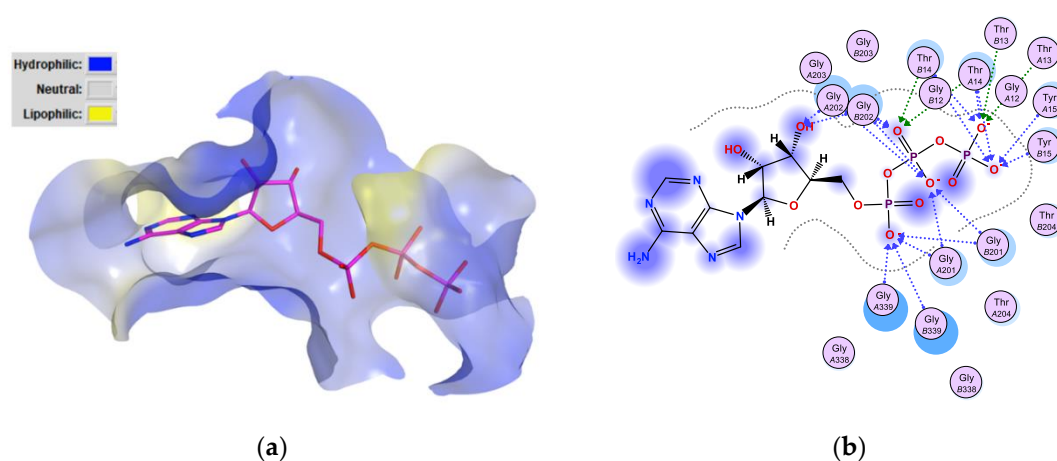

**Supplementary Figure S2.** ATP interactions with HSC70. **(a)** Representation of the surface of the ATP-binding site of HSC70/Bag 1 in complex with ATP (sticks; PDB ID: 3FZF) showing the prevalence of hydrophilic (blue) in comparison to lipophilic (yellow) and neutral (grey) residues on the surface. **(b)** Ligand interaction diagram showing the binding of the  $\beta$ - and  $\gamma$ -phosphates of ATP stabilized by interactions with polar amino acids, water and cations in the binding site.

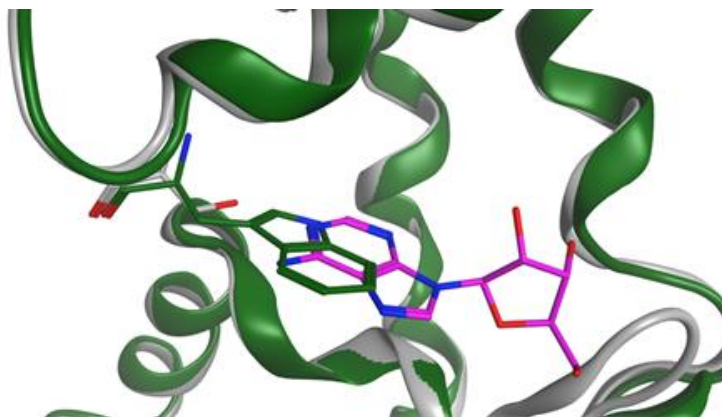

**Supplementary Figure S3.** ATP site structure in S275W HSC70. Overlay of wild type HSC70-NBD bound to adenosine (PDB ID 5AQF; grey) with the S275W mutant HSC70-NBD (PDB ID 5AQL; green). The large indole group of the tryptophan (green sticks) occupies the space where the adenine ring of adenosine (magenta sticks) would normally bind.

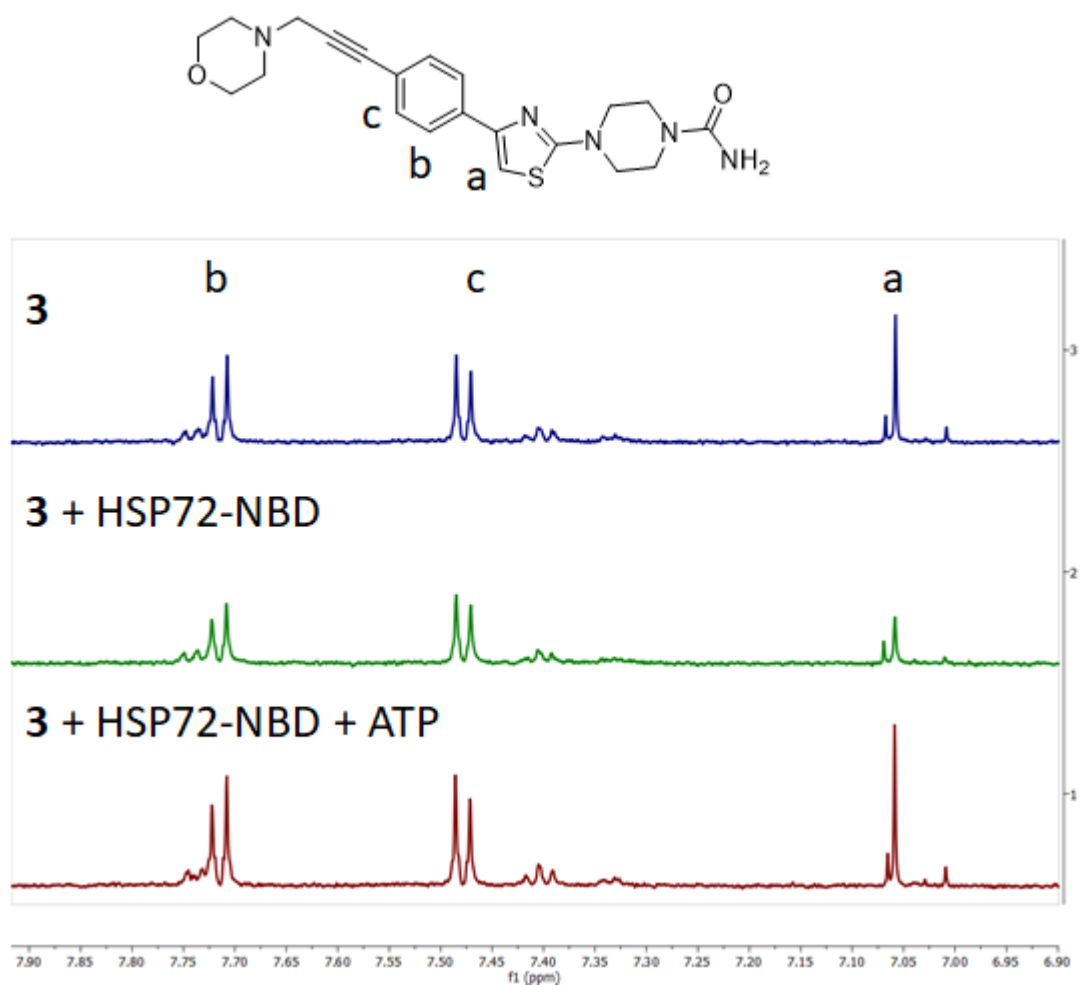

**Supplementary Figure S4.** Binding of 3 to HSP72-NBD was detected by CPMG LO-NMR and displaced by the addition of ATP.

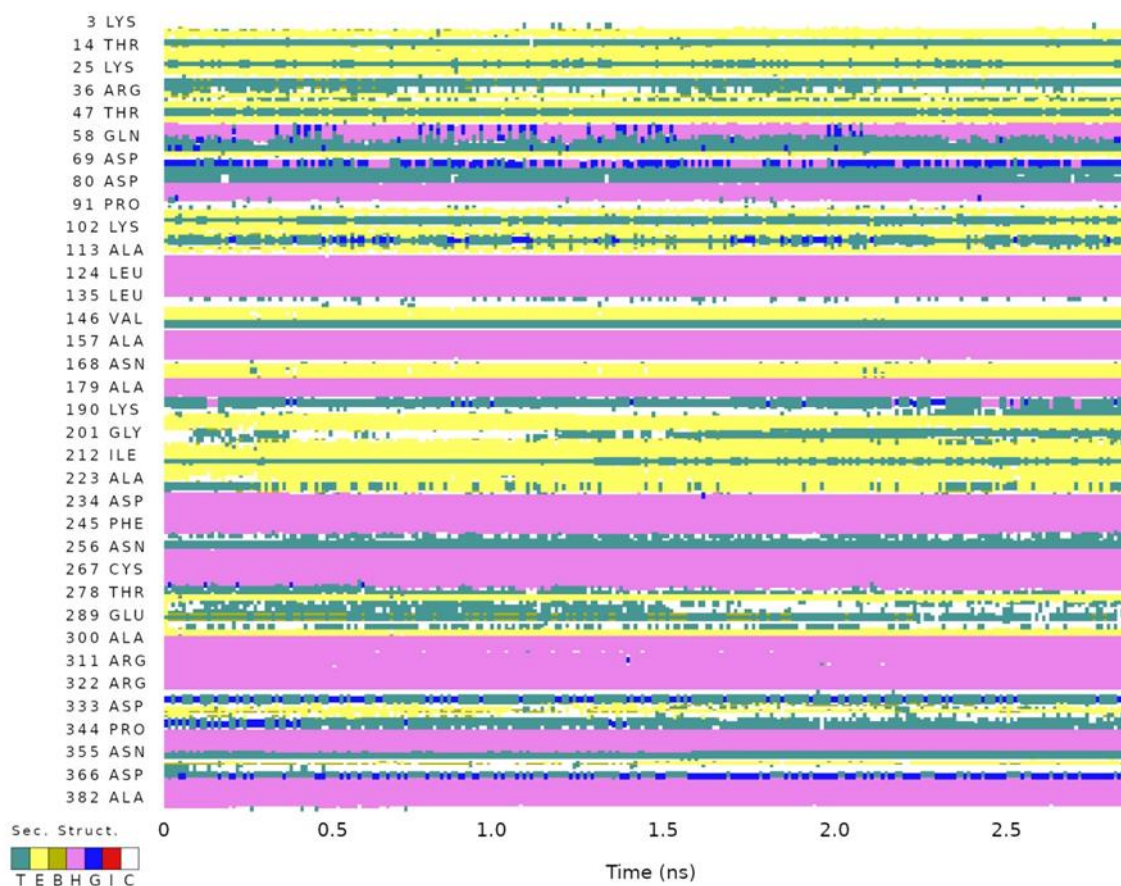

**Supplementary Figure S5.** Protein structural changes during ligand pulling MD simulation. Heat map representation of HSP72-NBD secondary structures showing they are broadly maintained during the MD pulling experiment to remove **1** from the secondary binding site; where T represents the turns, E the  $\beta$ -sheet, B the isolated bridge, H the  $\alpha$ -helix, G the 3-10 helix, I the  $\Pi$ -helix and C the coil structures.

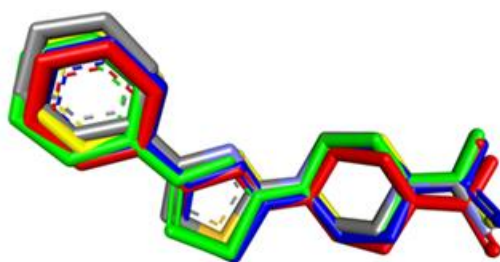

**Supplementary Figure S6.** Validation of HSP70 docking protocol. Overlays of the docked binding poses of **1** with the crystallographic data for **1**-HSP72-NB (PDB ID: 7Q4R). The crystal structure conformation of **1** is colored by element, the docked conformations are colored as: ChemPLP, blue; CS, red; GS, yellow, and ASP, green. The root-mean-square deviation (RMSD) between the heavy atoms of **1** in the crystal structure conformation and the predicted binding poses are: ChemPLP – 0.8422 Å, CS – 0.9190 Å, GS – 0.9602 Å and ASP – 0.7938 Å. RMSD values < 1 indicate excellent reproduction of the experimental situation.

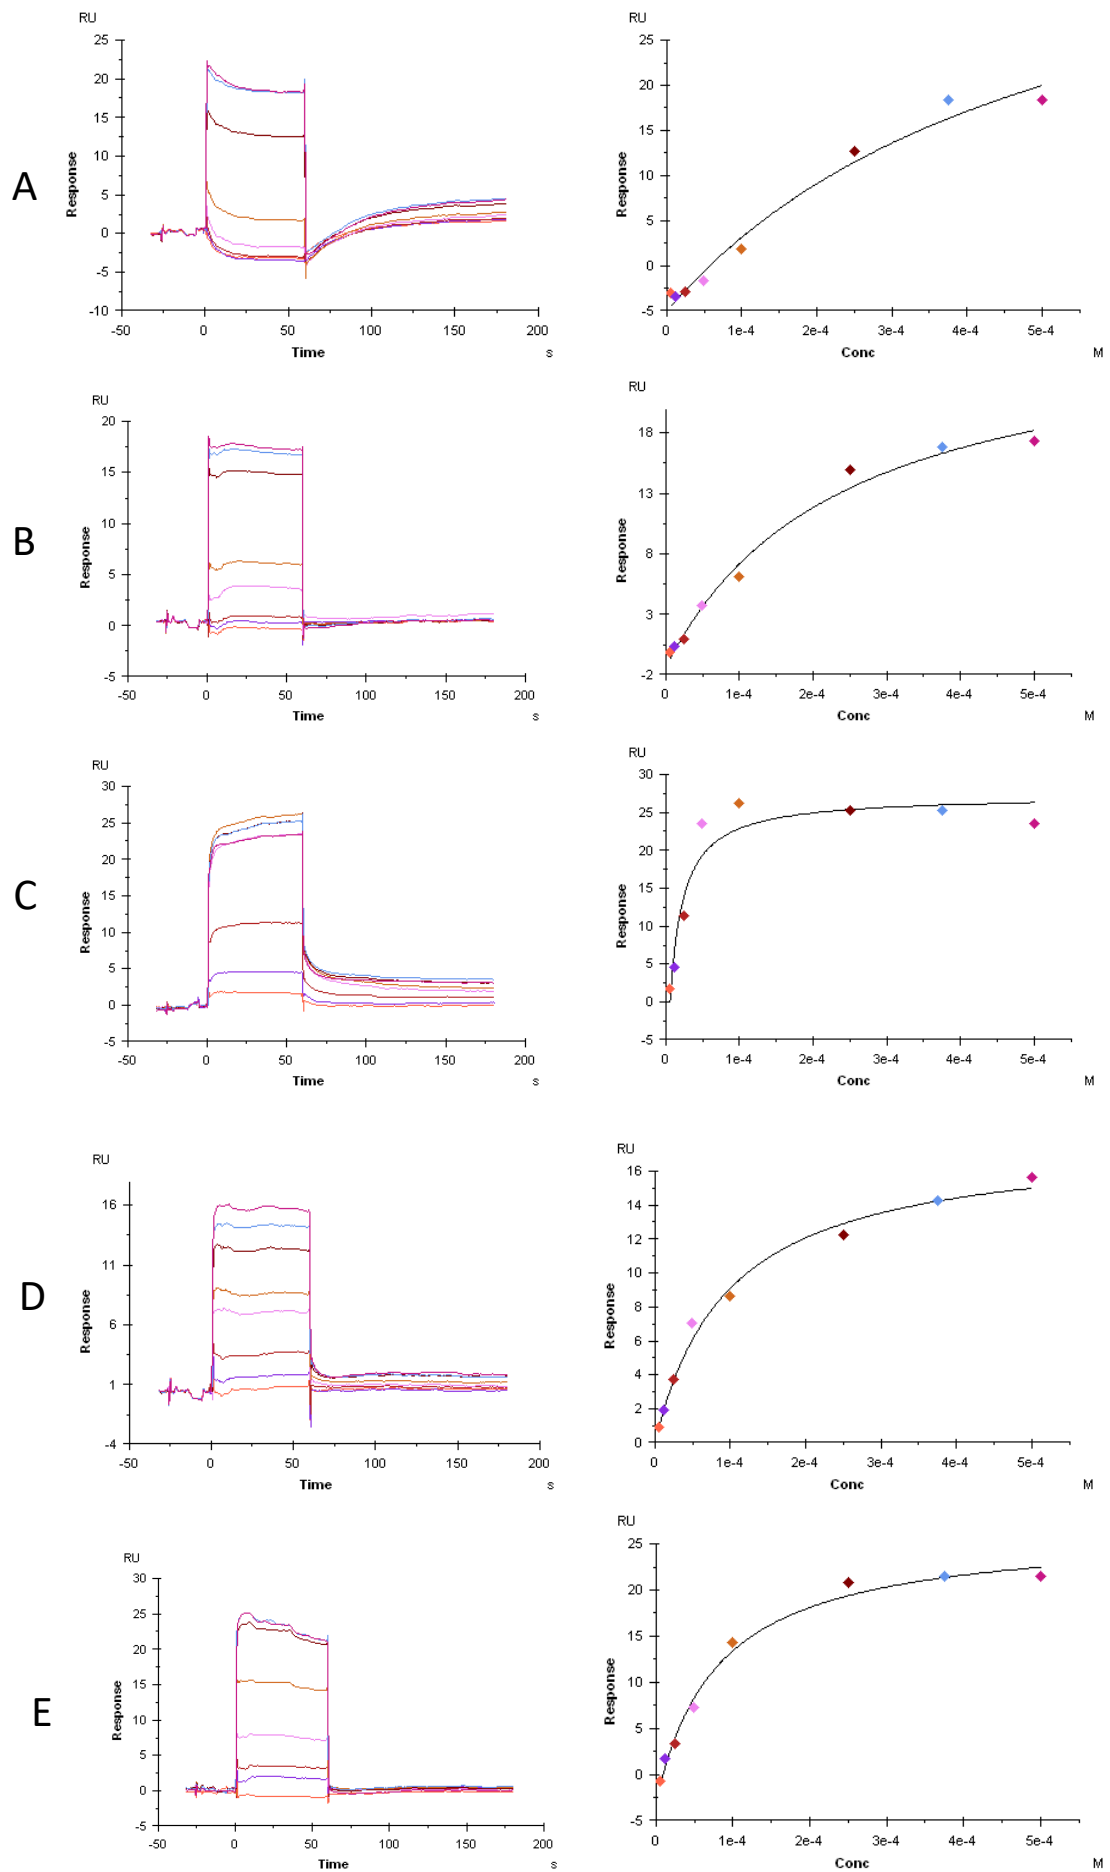

F

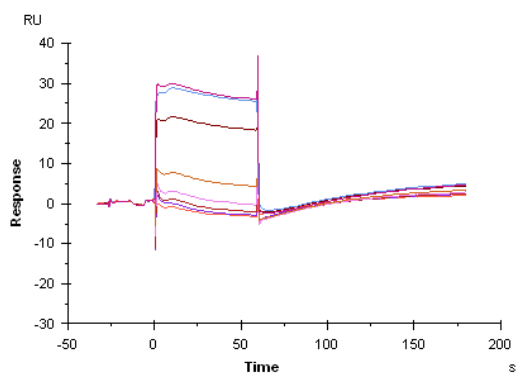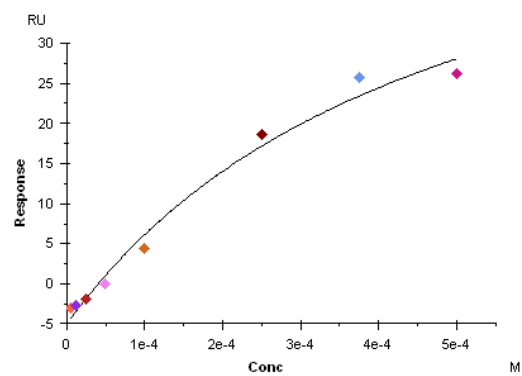

G

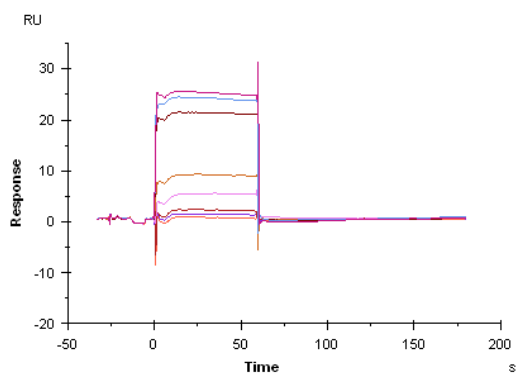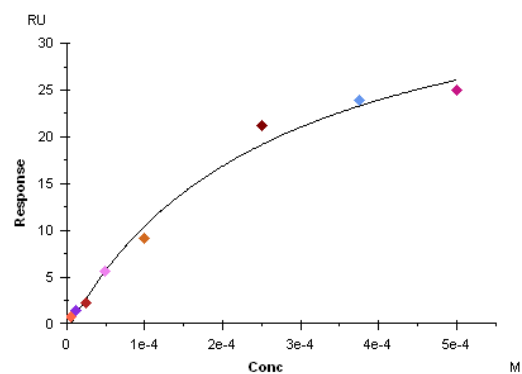

H

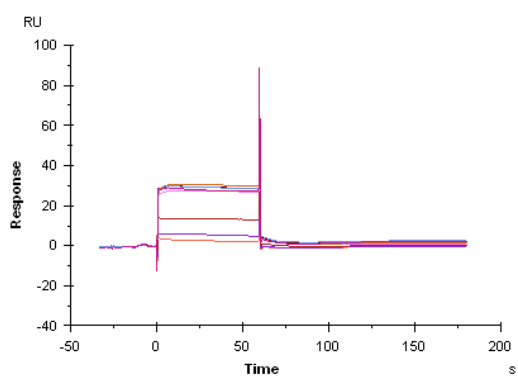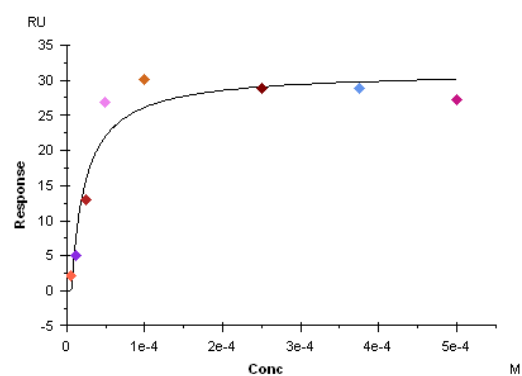

I

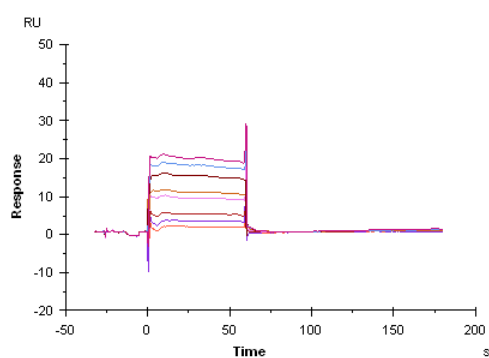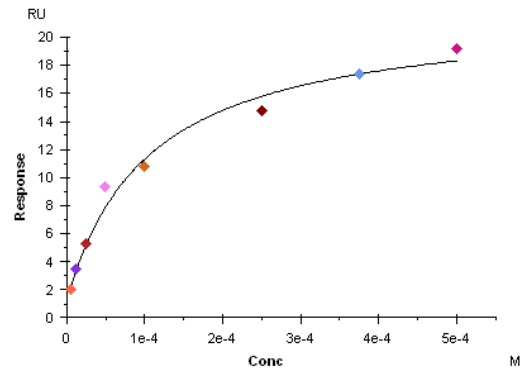

J

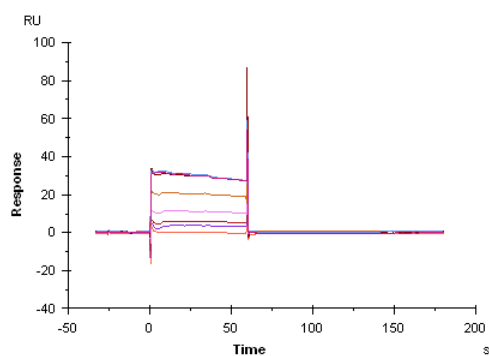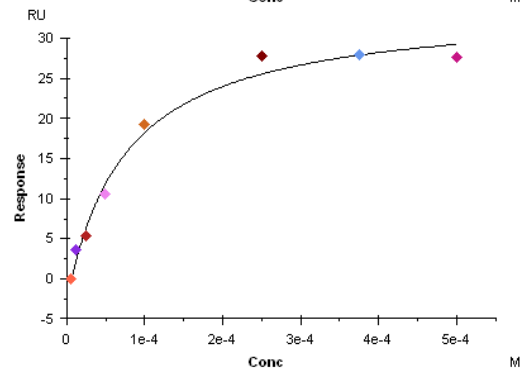

**Supplementary Figure S7.** SPR profiles of vHTS hits binding HSC70-NBD. Representative SPR sensorgrams and Langmuir isotherms for vHTS hits (a) 4, (b) 5, (c) 6, (d) 7 and (e) 8 binding to WT HSC70-NBD. Representative SPR sensorgrams and Langmuir isotherms for vHTS hits (f) 4, (g) 5, (h) 6, (i) 7 and (j) 8 binding to S275W HSC70-NBD.

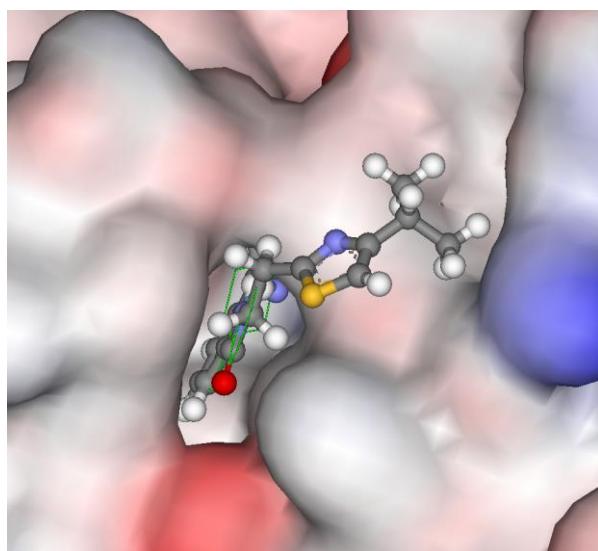

(a)

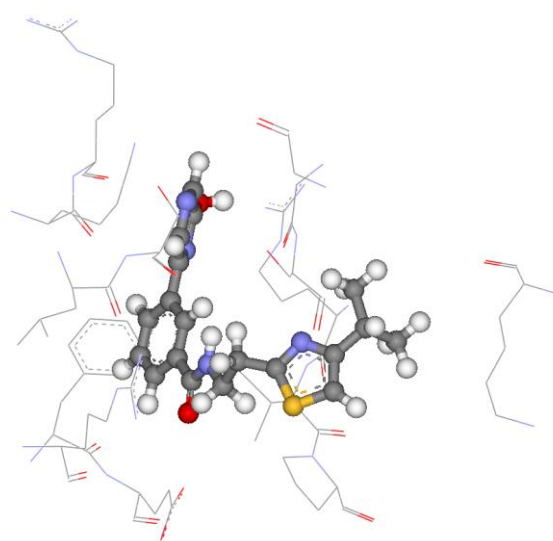

(b)

**Supplementary Figure S8.** The docked pose of compound **4** in the cryptic pocket of HSP70 as predicted by the ASP scoring function. **(a)** Compound **4** shown as ball-and-stick and the crystallized ligand **1** depicted as green lines. The protein surface shown where blue depicts regions with a partial positive charge on the surface, red depicts regions with a partial negative charge and grey shows neutral areas. **(b)** The predicted conformation depicted as ball-and-stick; no specific interactions are predicted between the ligand and the protein. The adjacent amino acids ( $< 5 \text{ \AA}$ ), buttressing the ligand, are shown as lines. Hydrogen atoms of the amino acids are omitted for clarity.



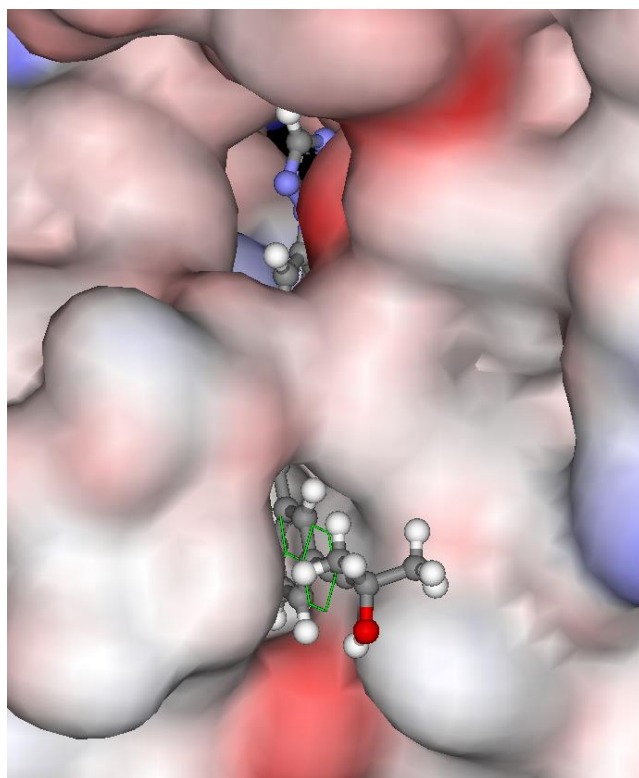

(a)

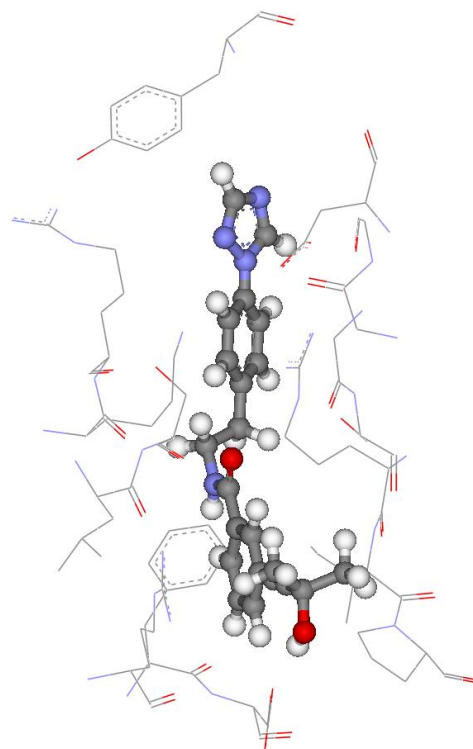

(b)

**Supplementary Figure S9.** The docked pose of compound **5** in the cryptic pocket of HSP70 as predicted by the ASP scoring function. **(a)** Compound **5** shown as ball-and-stick and the crystallized ligand **1** depicted as green lines. The protein surface shown where blue depicts regions with a partial positive charge on the surface, red depicts regions with a partial negative charge, and grey shows neutral areas. **(b)** The predicted conformation depicted as ball-and-stick; no specific interactions are predicted between the ligand and the protein. The adjacent amino acids (< 5 Å), buttressing the ligand, are shown as lines. Hydrogen atoms of the amino acids are omitted for clarity.

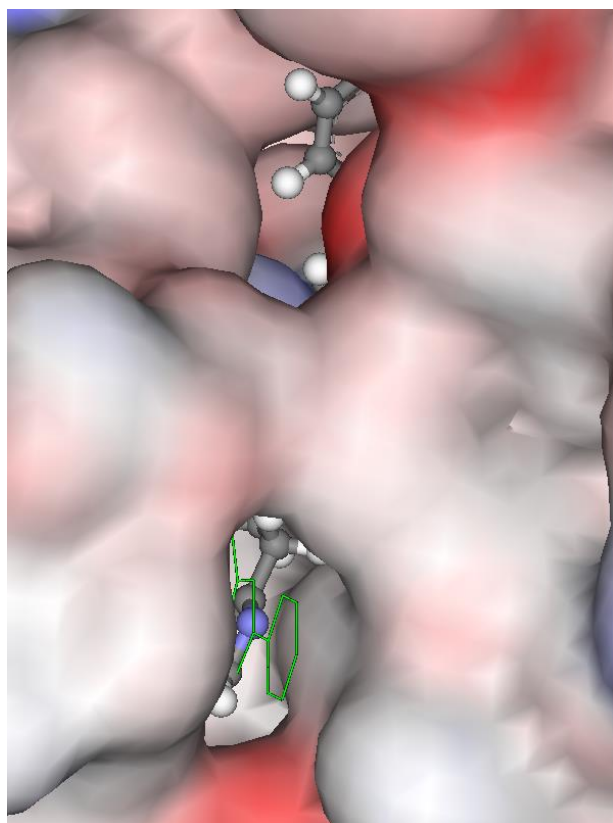

(a)

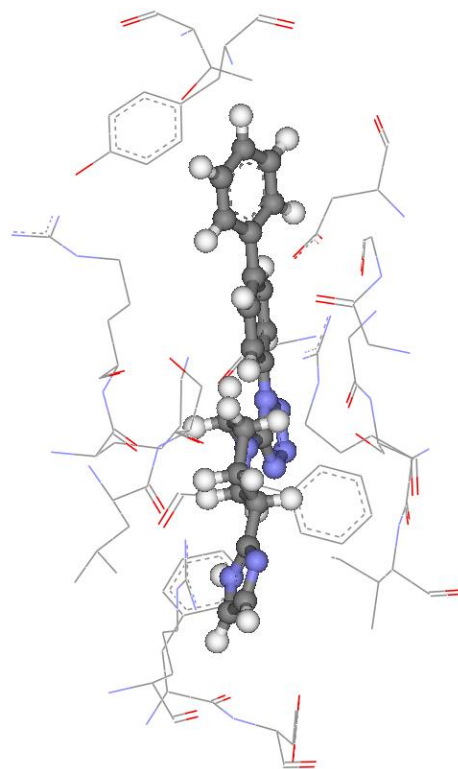

(b)

**Supplementary Figure S10.** The docked pose of compound **6** in the cryptic pocket of HSP70 as predicted by the ASP scoring function. **(a)** Compound **6** shown as ball-and-stick and the crystallized ligand **1** depicted as green lines. The protein surface shown where blue depicts regions with a partial positive charge on the surface, red depicts regions with a partial negative charge, and grey shows neutral areas. **(b)** The predicted conformation depicted as ball-and-stick; no specific interactions are predicted between the ligand and the protein. The adjacent amino acids ( $< 5 \text{ \AA}$ ), buttressing the ligand, are shown as lines. Hydrogen atoms of the amino acids are omitted for clarity.

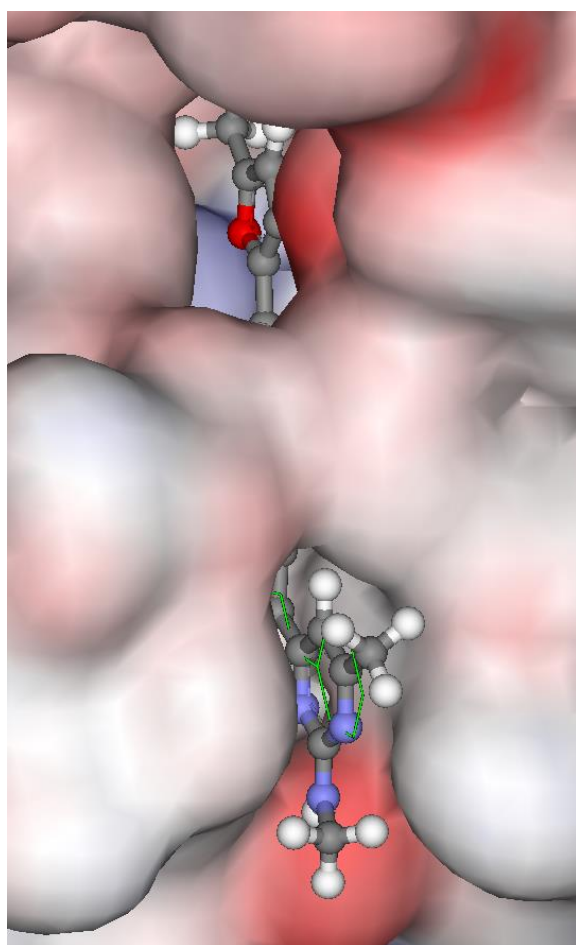

(a)

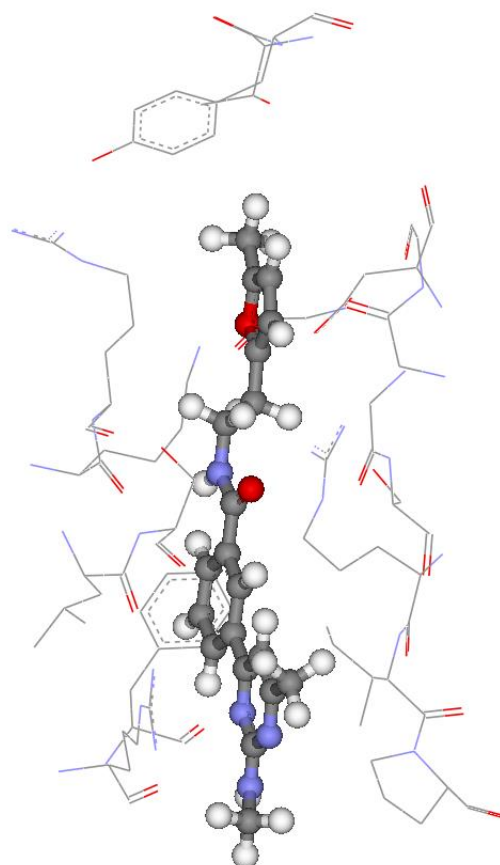

(b)

**Supplementary Figure S11.** The docked pose of compound 7 in the cryptic pocket of HSP70 as predicted by the ASP scoring function. (a) Compound 7 shown as ball-and-stick and the crystallized ligand 1 depicted as green lines. The protein surface shown where blue depicts regions with a partial positive charge on the surface, red depicts regions with a partial negative charge, and grey shows neutral areas. (b) The predicted conformation depicted as ball-and-stick; no specific interactions are predicted between the ligand and the protein. The adjacent amino acids (< 5 Å), buttressing the ligand, are shown as lines. Hydrogen atoms of the amino acids are omitted for clarity.

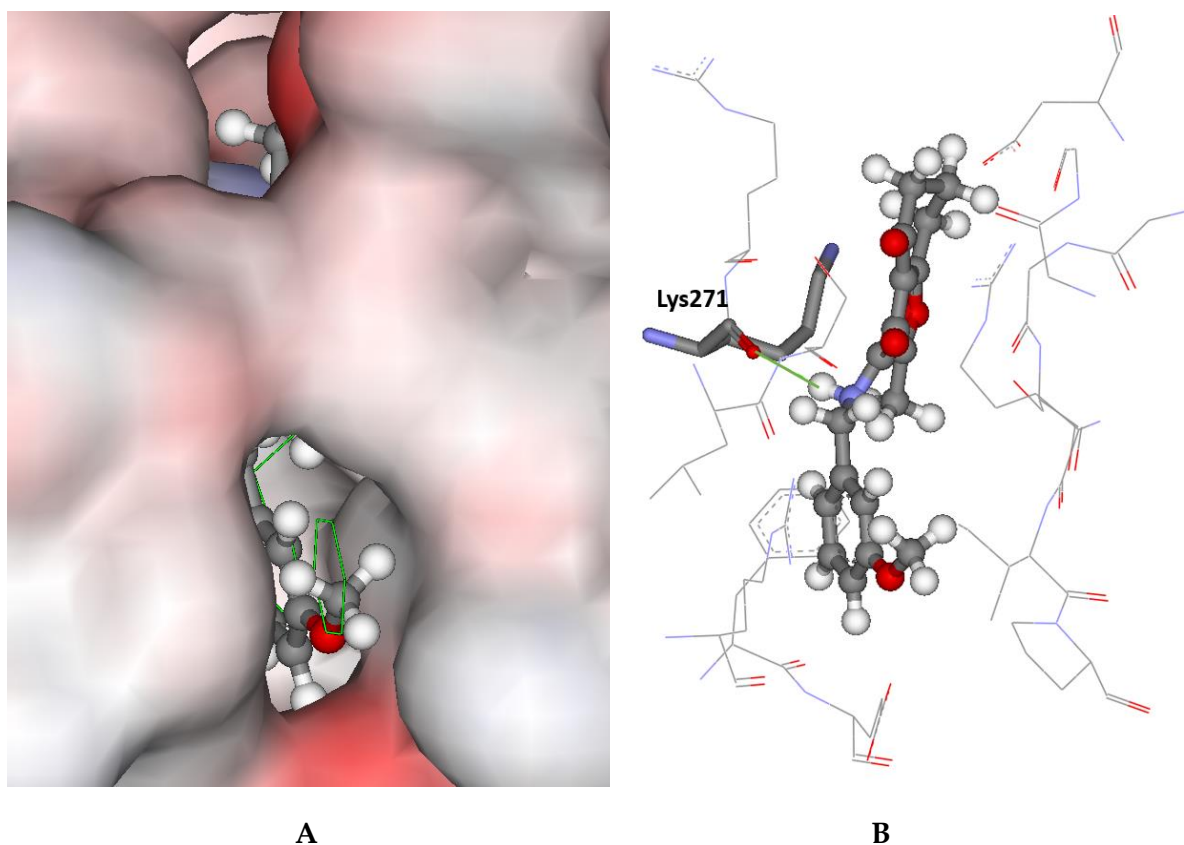

**Supplementary Figure S12.** The docked pose of compound **8** in the cryptic pocket of HSP70 as predicted by the ASP scoring function. **(A)** Compound **8** shown as ball-and-stick format and the crystallized ligand **1** depicted as green lines. The protein surface shown where blue depicts regions with a partial positive charge on the surface, red depicts regions with a partial negative charge, and grey shows neutral areas. **(B)** The predicted conformation depicted as ball-and-stick; hydrogen bonding between the Lys271 carbonyl backbone group and the amine moiety in the ligand is seen (green line). The adjacent amino acids ( $< 5 \text{ \AA}$ ), buttressing the ligand, are shown as lines. Hydrogen atoms of the amino acids are omitted for clarity.

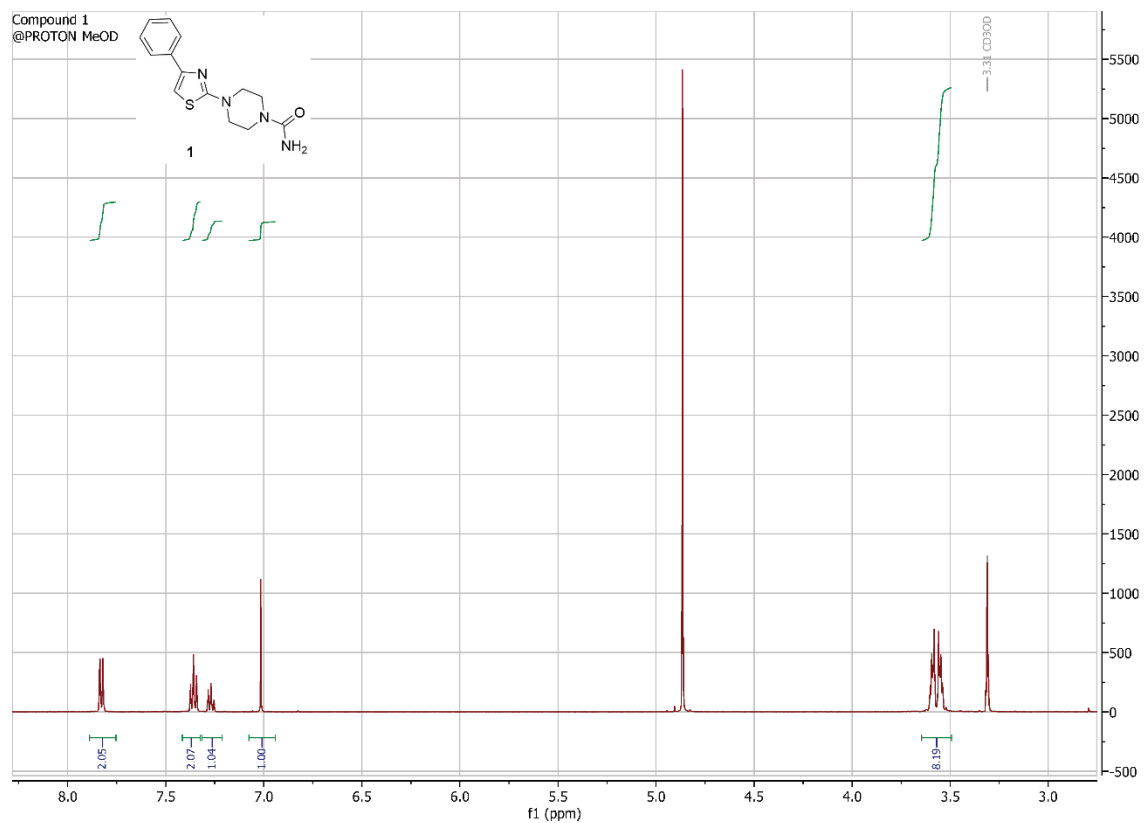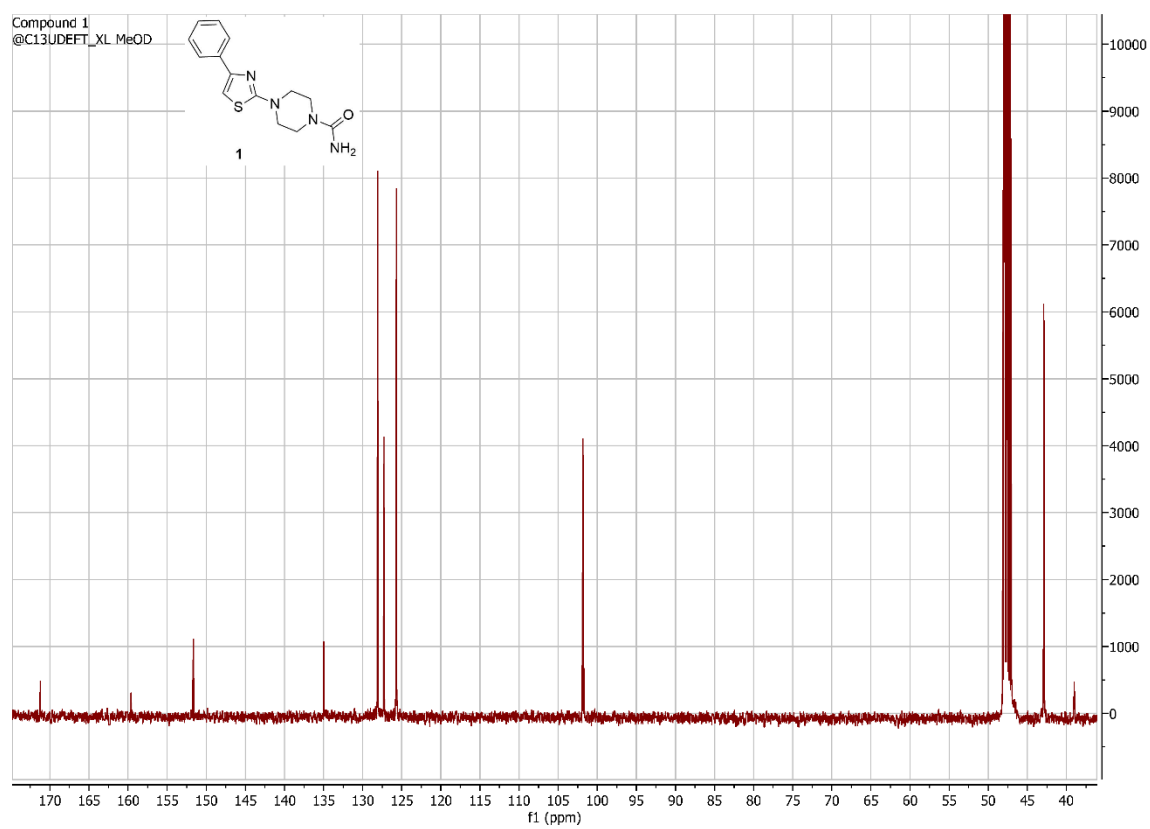

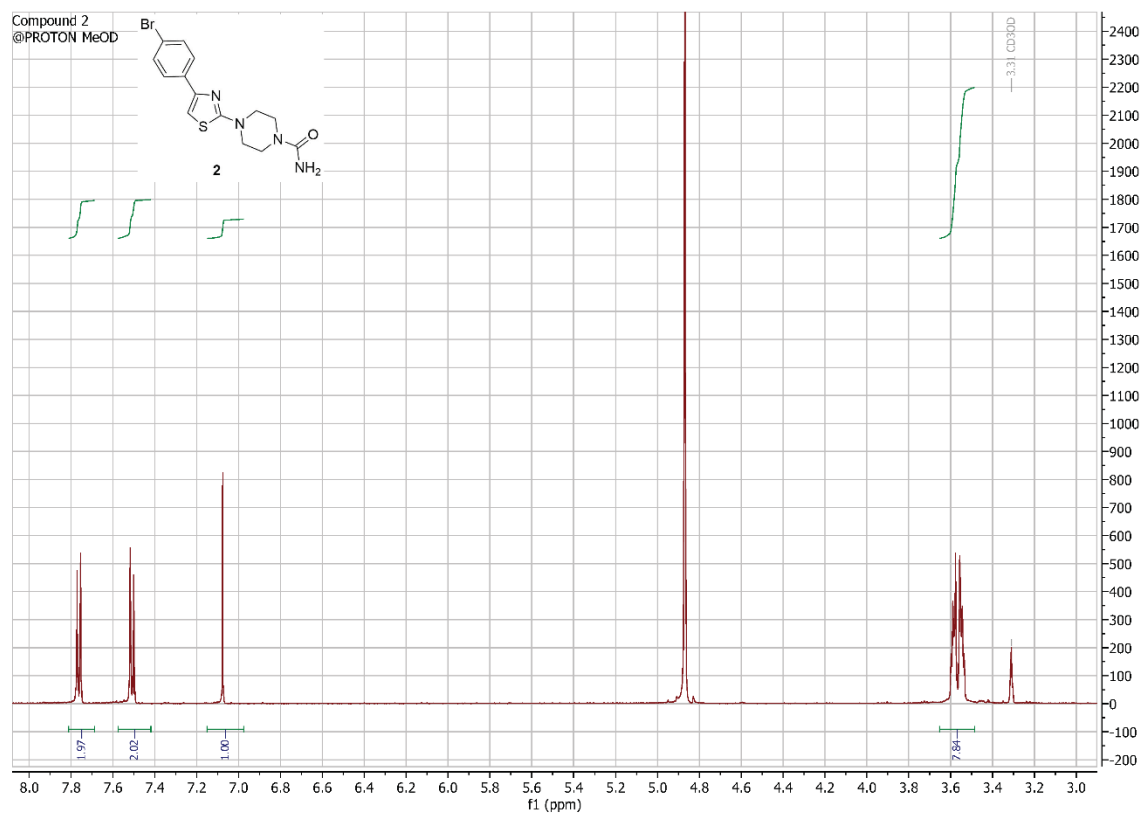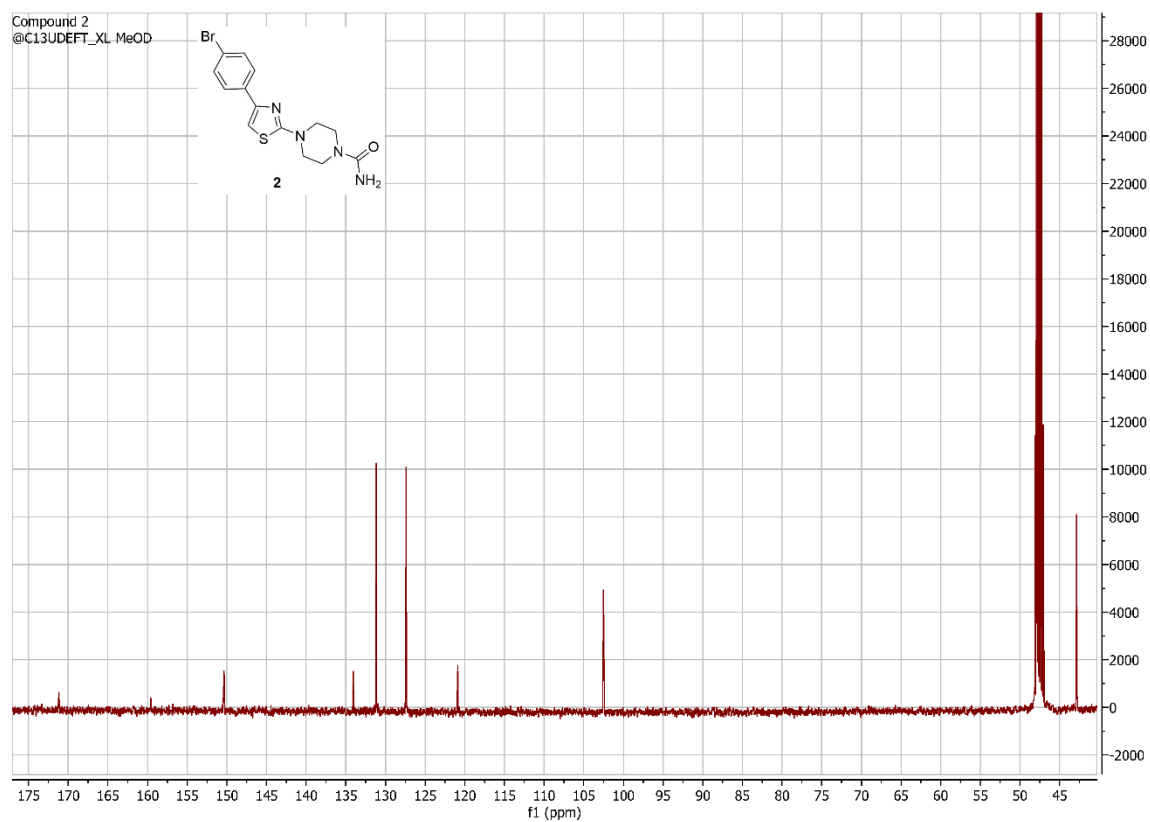

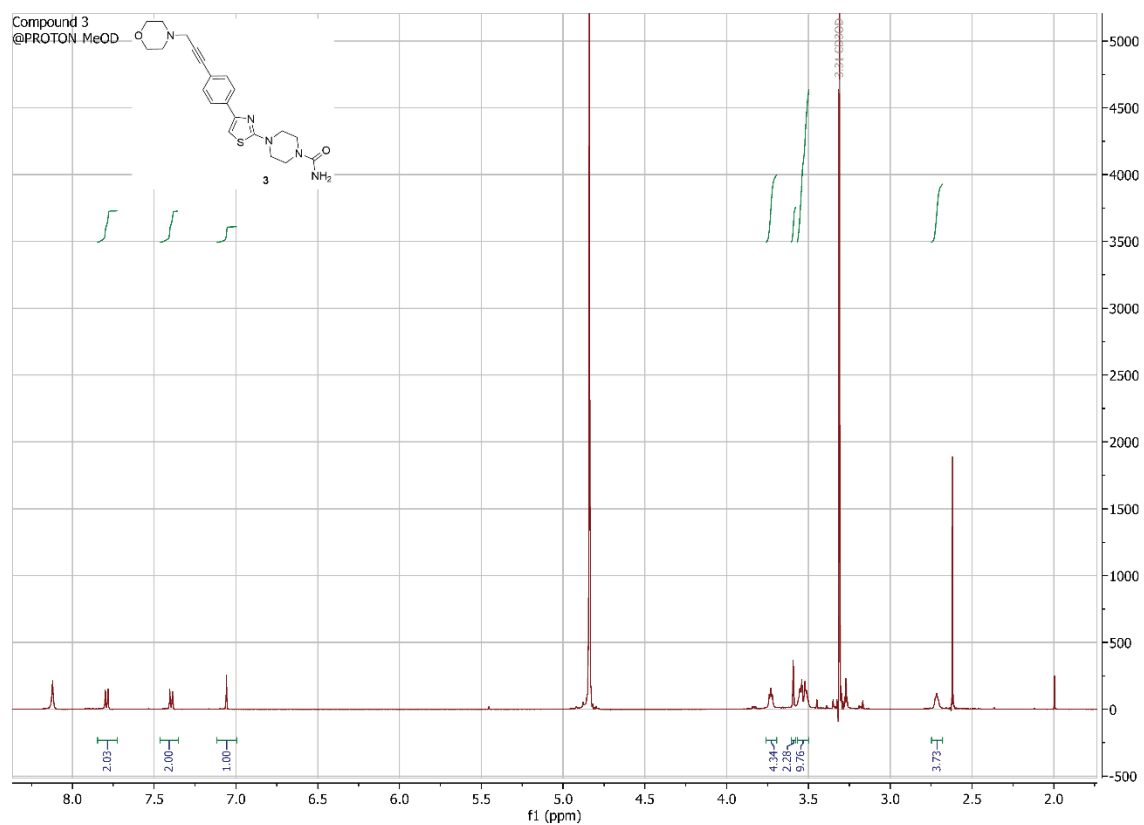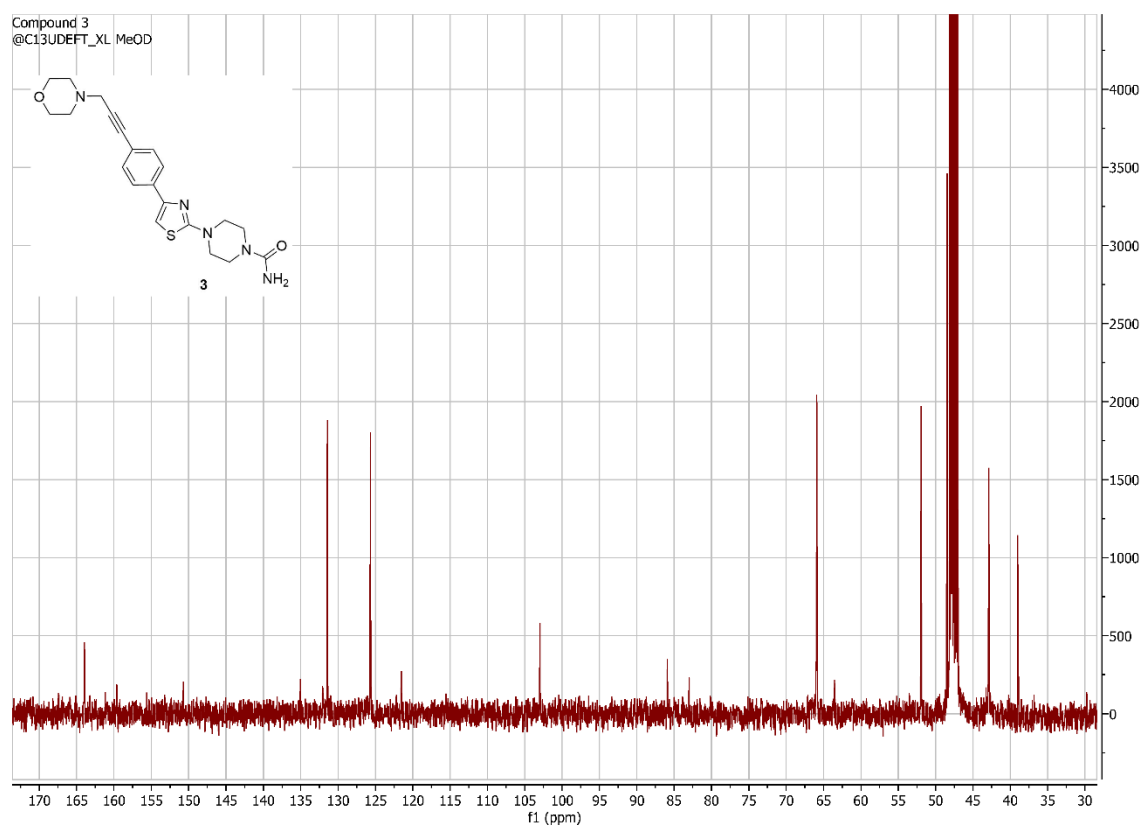

Supplementary Figure S13.  $^1\text{H}$  and  $^{13}\text{C}$  NMR spectra for compounds 1, 2 and 3.

# Compound 1

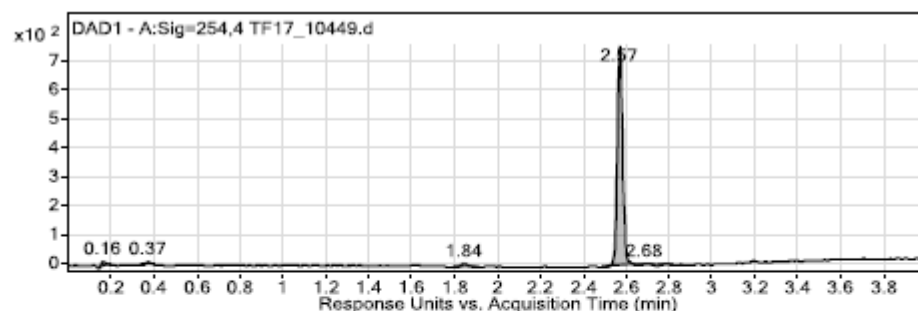

User Chromatogram Peak List

| Peak # | RT (mins) | Area    | Area Sum % |
|--------|-----------|---------|------------|
| 1      | 0.16      | 34.14   | 2.36       |
| 2      | 0.37      | 18.78   | 1.3        |
| 3      | 1.84      | 34.56   | 2.39       |
| 4      | 2.57      | 1328.87 | 91.85      |
| 5      | 2.68      | 15.85   | 1.1        |
| 6      | 2.78      | 14.65   | 1.01       |

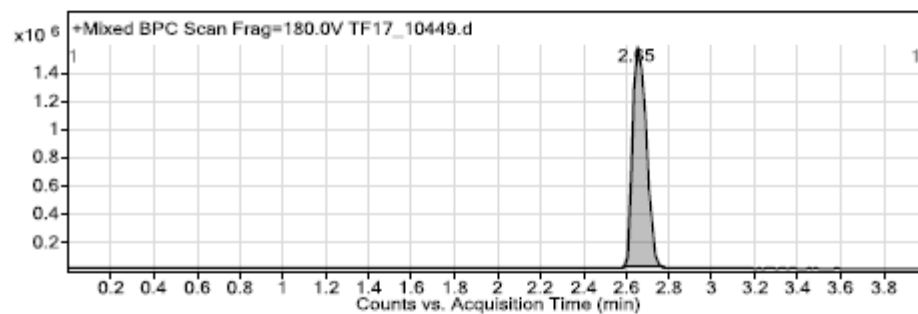

User Chromatogram Peak List

| Peak # | RT (mins) | Area    | Area Sum % | Base Peak m/z |
|--------|-----------|---------|------------|---------------|
| 1      | 2.65      | 6945886 | 100        | 289.1134      |

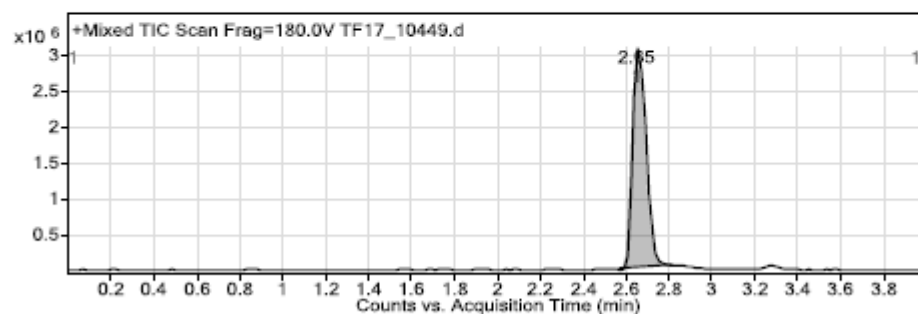

User Chromatogram Peak List

| Peak # | RT (mins) | Area     | Area Sum % | Base Peak m/z |
|--------|-----------|----------|------------|---------------|
| 1      | 2.65      | 13459003 | 100        | 289.1134      |



RT  
2.65

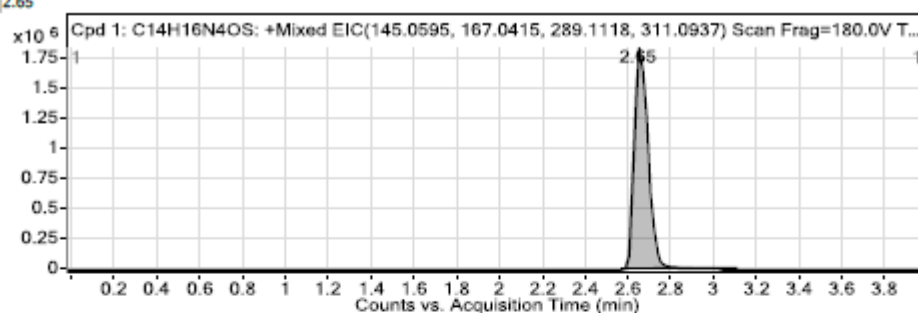

MS Spectrum

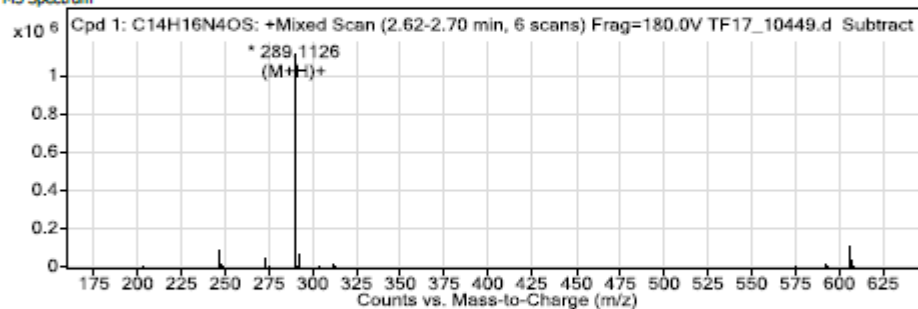

MS Spectrum Peak List

| Observed m/z | Calculated Formula [M+H] <sup>+</sup>                           | Target m/z | Error (ppm) | Abundance |
|--------------|-----------------------------------------------------------------|------------|-------------|-----------|
| 289.1126     | C <sub>14</sub> H <sub>17</sub> N <sub>4</sub> O <sub>5</sub>   | 289.1118   | 3.03        | 1118560   |
| 289.3229     |                                                                 |            |             | 110781    |
| 289.4331     |                                                                 |            |             | 6723      |
| 289.5367     |                                                                 |            |             | 11208     |
| 290.1156     | C <sub>14</sub> H <sub>17</sub> N <sub>4</sub> O <sub>5</sub>   | 290.1144   | 3.85        | 278287    |
| 290.3276     |                                                                 |            |             | 13527     |
| 291.1124     | C <sub>14</sub> H <sub>17</sub> N <sub>4</sub> O <sub>5</sub>   | 291.1101   | 8.03        | 63929     |
| 292.114      | C <sub>14</sub> H <sub>17</sub> N <sub>4</sub> O <sub>5</sub>   | 292.1116   | 8.44        | 9729      |
| 311.0936     | C <sub>14</sub> H <sub>16</sub> N <sub>4</sub> NaO <sub>5</sub> | 311.0937   | -0.43       | 22912     |
| 312.0964     | C <sub>14</sub> H <sub>16</sub> N <sub>4</sub> NaO <sub>5</sub> | 312.0964   | 6.45        | 5409      |

--- End Of Report ---

# Compound 2

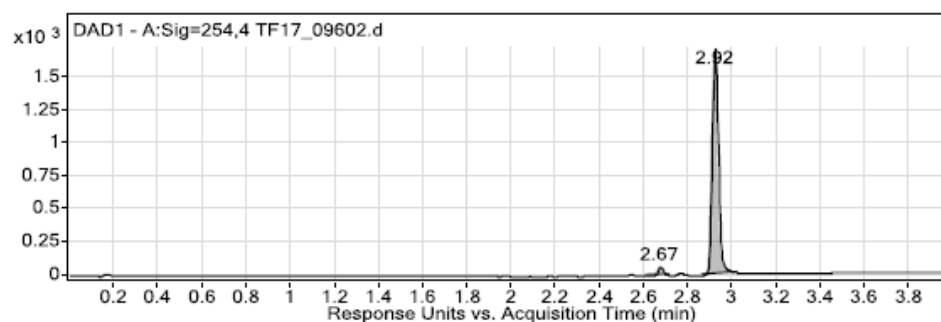

User Chromatogram Peak List

| Peak # | RT (mins) | Area    | Area Sum % |
|--------|-----------|---------|------------|
| 1      | 2.67      | 113.05  | 3.21       |
| 2      | 2.92      | 3404.66 | 96.79      |

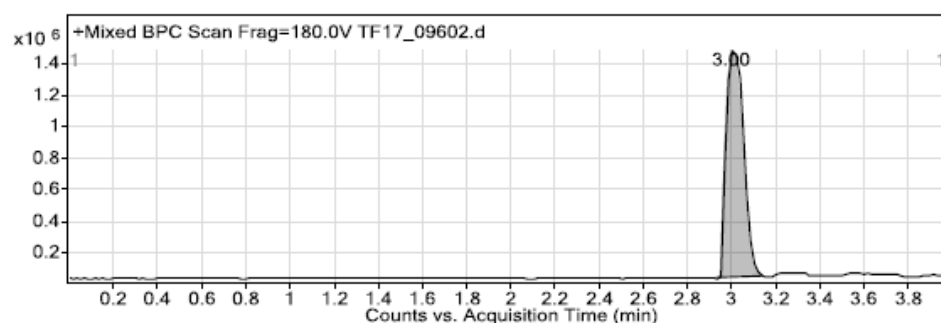

User Chromatogram Peak List

| Peak # | RT (mins) | Area    | Area Sum % | Base Peak m/z |
|--------|-----------|---------|------------|---------------|
| 1      | 3         | 7908419 | 100        | 369.0167      |

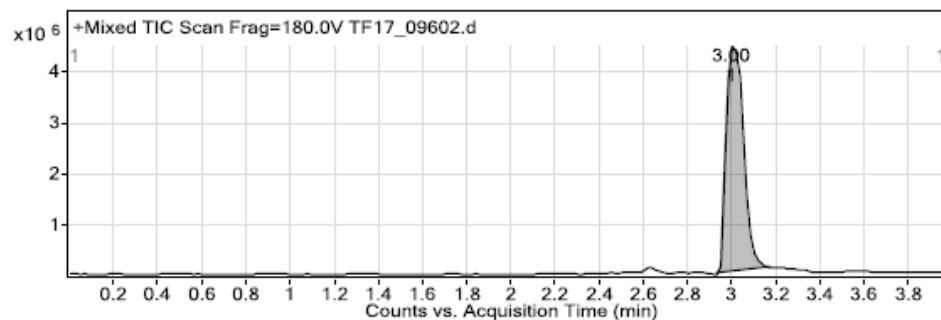

User Chromatogram Peak List

| Peak # | RT (mins) | Area     | Area Sum % | Base Peak m/z |
|--------|-----------|----------|------------|---------------|
| 1      | 3         | 24098671 | 100        | 369.0167      |

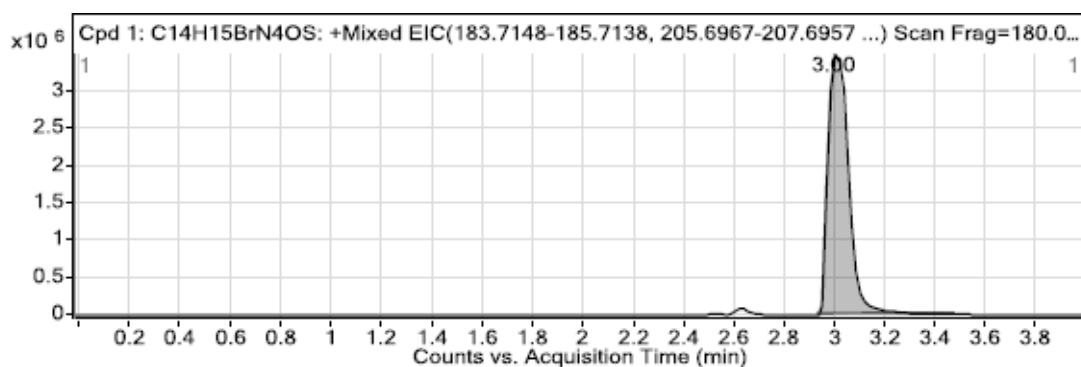

MS Spectrum

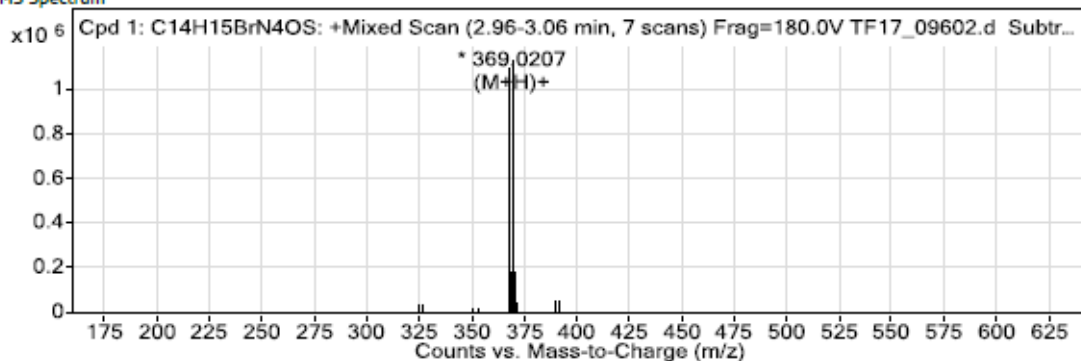

MS Spectrum Peak List

| Observed m/z | Calculated Formula [M+H] <sup>+</sup>                               | Target m/z | Error (ppm) | Abundance |
|--------------|---------------------------------------------------------------------|------------|-------------|-----------|
| 367.0225     | C <sub>14</sub> H <sub>16</sub> Br N <sub>4</sub> O <sub>5</sub>    | 367.0223   | 0.73        | 1089692   |
| 367.2595     |                                                                     |            |             | 94116     |
| 368.0245     | C <sub>14</sub> H <sub>16</sub> Br N <sub>4</sub> O <sub>5</sub>    | 368.025    | -1.19       | 182806    |
| 369.0207     | C <sub>14</sub> H <sub>16</sub> Br N <sub>4</sub> O <sub>5</sub>    | 369.0202   | 1.15        | 1127631   |
| 369.257      |                                                                     |            |             | 112090    |
| 369.4974     |                                                                     |            |             | 13494     |
| 370.0225     | C <sub>14</sub> H <sub>16</sub> Br N <sub>4</sub> O <sub>5</sub>    | 370.0229   | -0.89       | 181124    |
| 371.0186     | C <sub>14</sub> H <sub>16</sub> Br N <sub>4</sub> O <sub>5</sub>    | 371.0186   | -0.14       | 49207     |
| 389.004      | C <sub>14</sub> H <sub>15</sub> Br N <sub>4</sub> Na O <sub>5</sub> | 389.0042   | -0.59       | 54675     |
| 391.0016     | C <sub>14</sub> H <sub>15</sub> Br N <sub>4</sub> Na O <sub>5</sub> | 391.0022   | -1.64       | 57026     |

--- End Of Report ---

# Compound 3

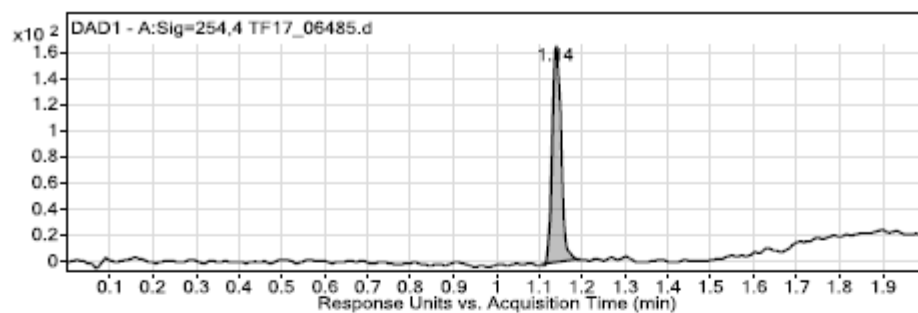

User Chromatogram Peak List

| Peak # | RT (mins) | Area  | Area Sum % |
|--------|-----------|-------|------------|
| 1      | 1.14      | 241.5 | 100        |

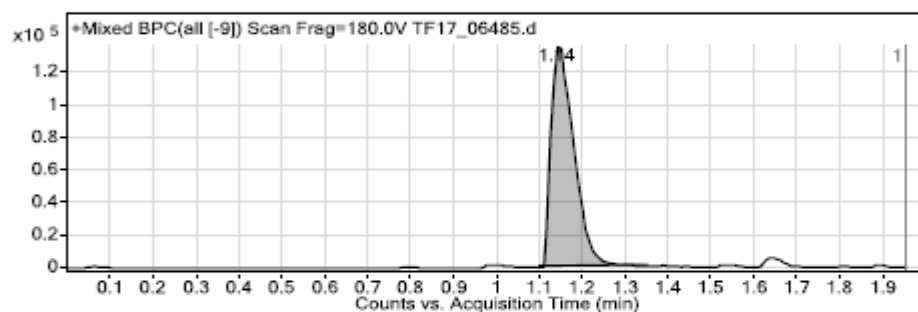

User Chromatogram Peak List

| Peak # | RT (mins) | Area   | Area Sum % | Base Peak m/z |
|--------|-----------|--------|------------|---------------|
| 1      | 1.14      | 502236 | 100        | 412.178       |

RT  
1.15

MFE MS Spectrum

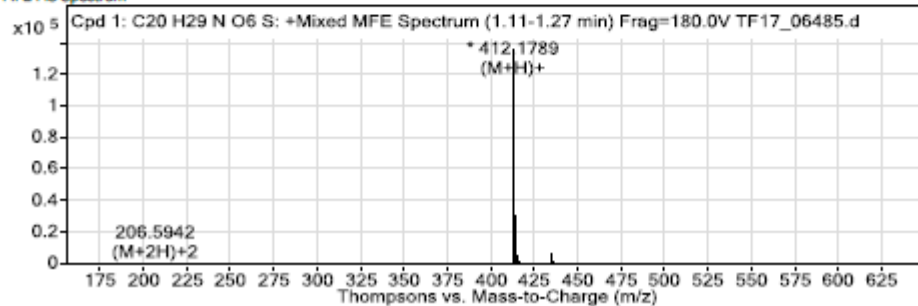

--- End Of Report ---

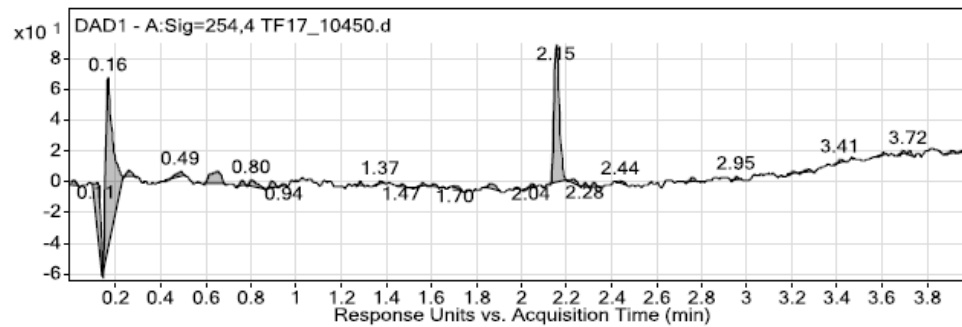

User Chromatogram Peak List

| Peak # | RT (mins) | Area   | Area Sum % |
|--------|-----------|--------|------------|
| 2      | 0.11      | 42.11  | 6.72       |
| 3      | 0.16      | 268.64 | 42.85      |
| 4      | 0.26      | 7.43   | 1.18       |
| 5      | 0.49      | 10.57  | 1.69       |
| 6      | 0.65      | 29.58  | 4.72       |
| 7      | 0.76      | 5.35   | 0.85       |
| 8      | 0.8       | 12.25  | 1.95       |
| 9      | 0.89      | 8.66   | 1.38       |
| 17     | 1.86      | 8.75   | 1.4        |
| 19     | 2.15      | 147.26 | 23.49      |

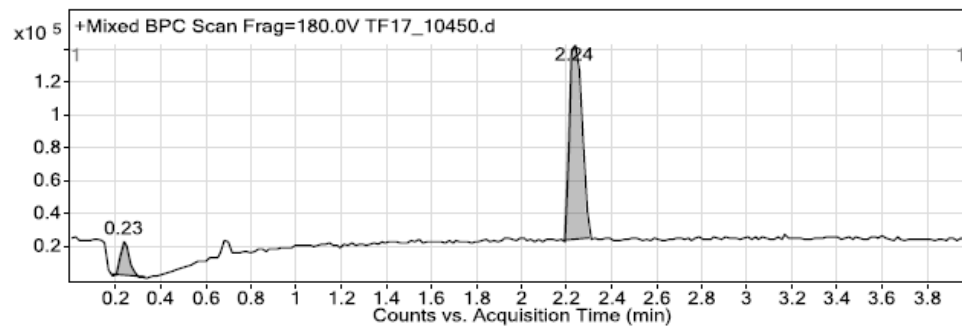

User Chromatogram Peak List

| Peak # | RT (mins) | Area   | Area Sum % | Base Peak m/z |
|--------|-----------|--------|------------|---------------|
| 1      | 0.23      | 62265  | 11.84      | 274.1086      |
| 2      | 2.24      | 463460 | 88.16      | 412.1801      |

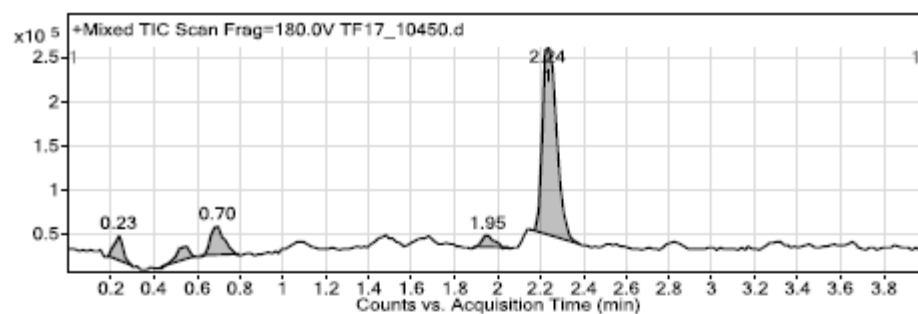

User Chromatogram Peak List

| Peak # | RT (mins) | Area   | Area Sum % | Base Peak m/z |
|--------|-----------|--------|------------|---------------|
| 1      | 0.23      | 85211  | 6.25       | 274.1086      |
| 2      | 0.55      | 81660  | 5.99       | 195.0891      |
| 3      | 0.7       | 153066 | 11.23      | 306.154       |
| 4      | 1.95      | 60551  | 4.44       | 195.0892      |
| 5      | 2.24      | 982115 | 72.08      | 412.1801      |

RT  
2.24

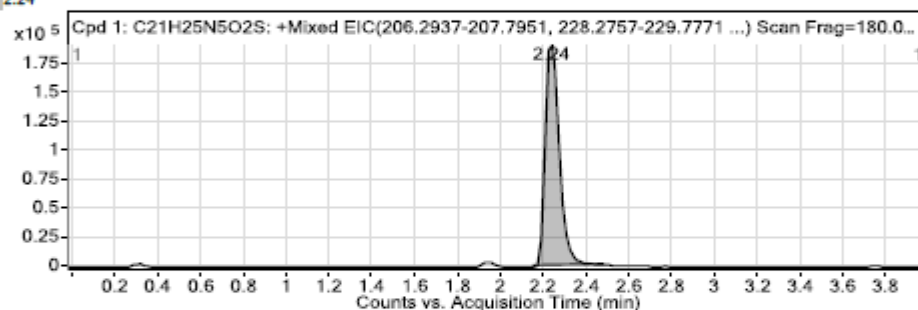

MS Spectrum

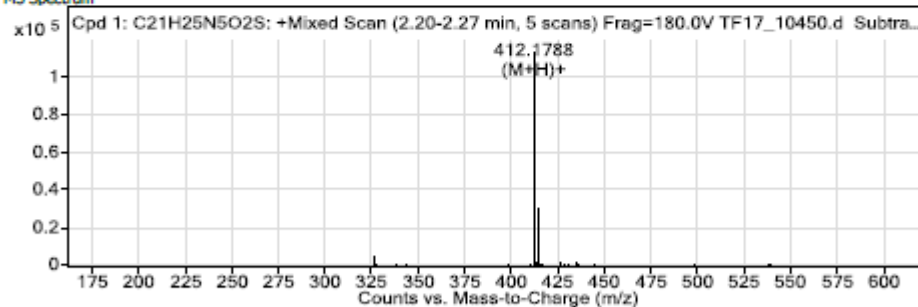

MS Spectrum Peak List

| Observed m/z | Calculated Formula [M+H] <sup>+</sup>                             | Target m/z | Error (ppm) | Abundance |
|--------------|-------------------------------------------------------------------|------------|-------------|-----------|
| 410.164      |                                                                   |            |             | 1090      |
| 411.1669     |                                                                   |            |             | 479       |
| 412.1788     | C <sub>21</sub> H <sub>26</sub> N <sub>5</sub> O <sub>2</sub> S   | 412.1802   | -3.21       | 113857    |
| 412.4315     |                                                                   |            |             | 2137      |
| 413.1831     | C <sub>21</sub> H <sub>26</sub> N <sub>5</sub> O <sub>2</sub> S   | 413.183    | 0.29        | 30286     |
| 413.4381     |                                                                   |            |             | 548       |
| 414.182      | C <sub>21</sub> H <sub>26</sub> N <sub>5</sub> O <sub>2</sub> S   | 414.1803   | 4.08        | 7243      |
| 415.1834     | C <sub>21</sub> H <sub>26</sub> N <sub>5</sub> O <sub>2</sub> S   | 415.1811   | 5.34        | 1465      |
| 434.1612     | C <sub>21</sub> H <sub>25</sub> N <sub>5</sub> NaO <sub>2</sub> S | 434.1621   | -2.04       | 2307      |
| 435.1642     | C <sub>21</sub> H <sub>25</sub> N <sub>5</sub> NaO <sub>2</sub> S | 435.1649   | -1.71       | 741       |

--- End Of Report ---

# Compound 4

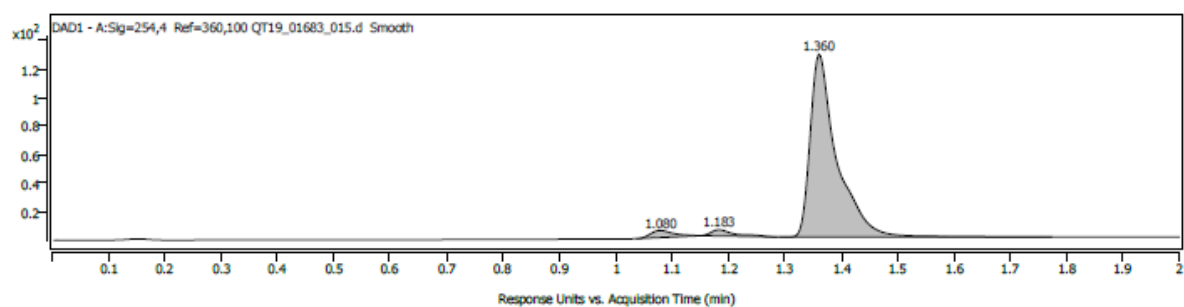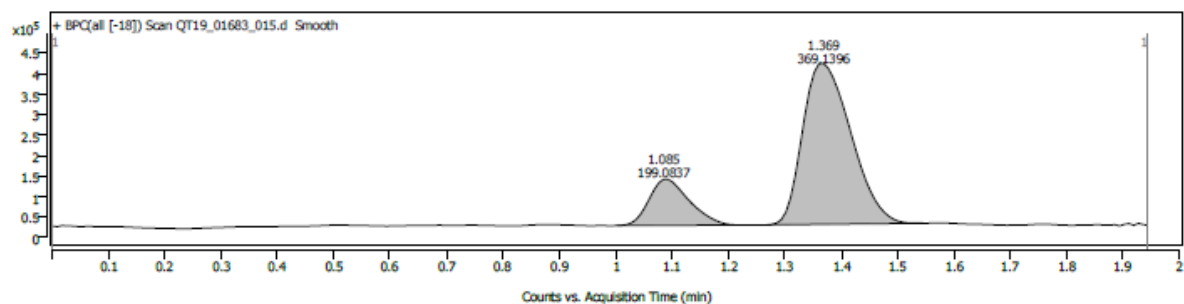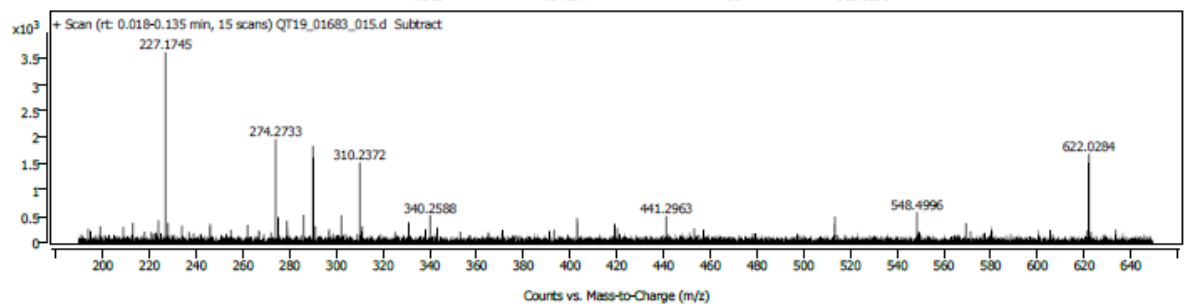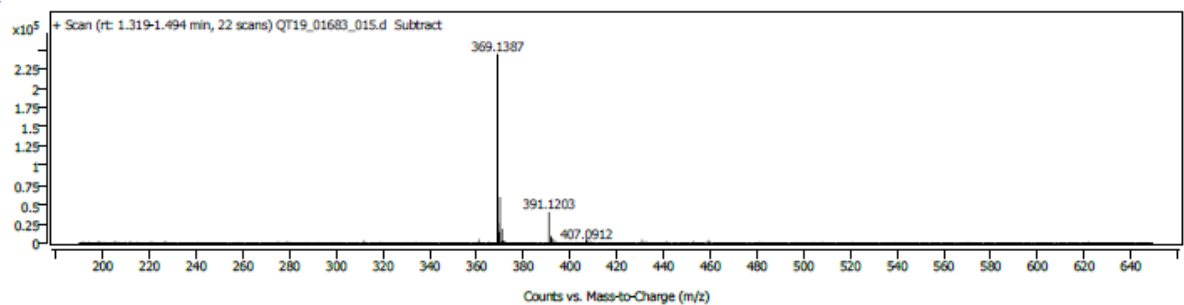

# Compound 5

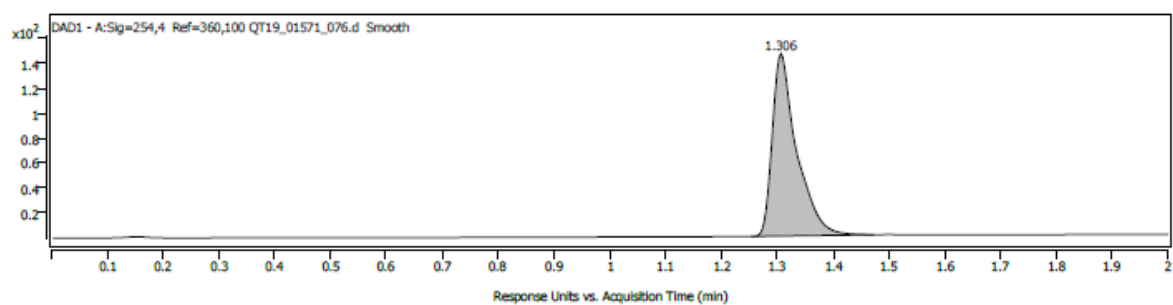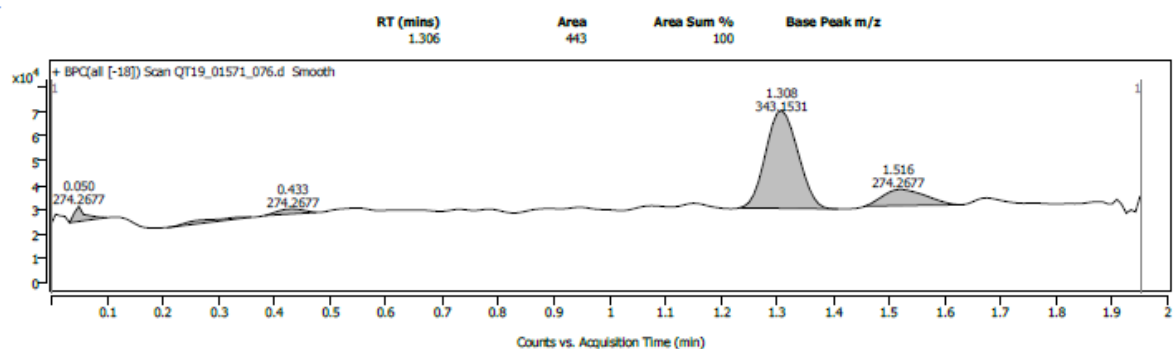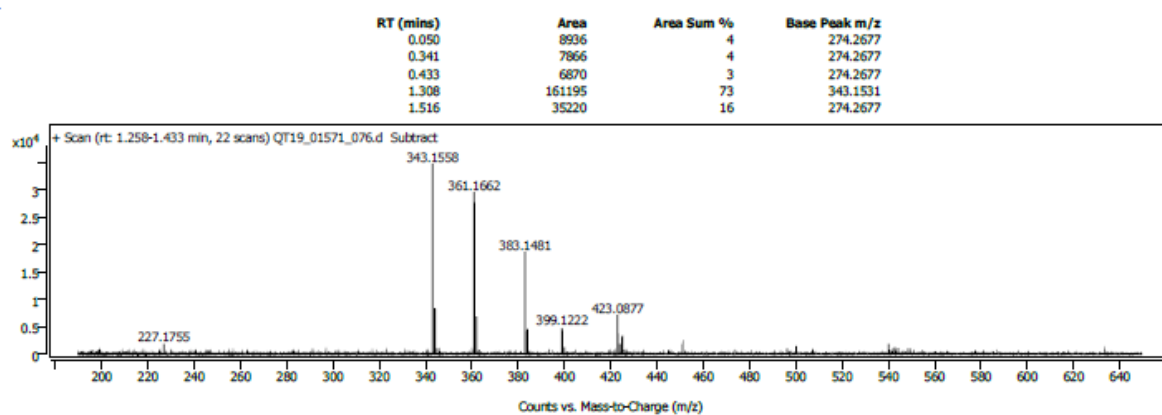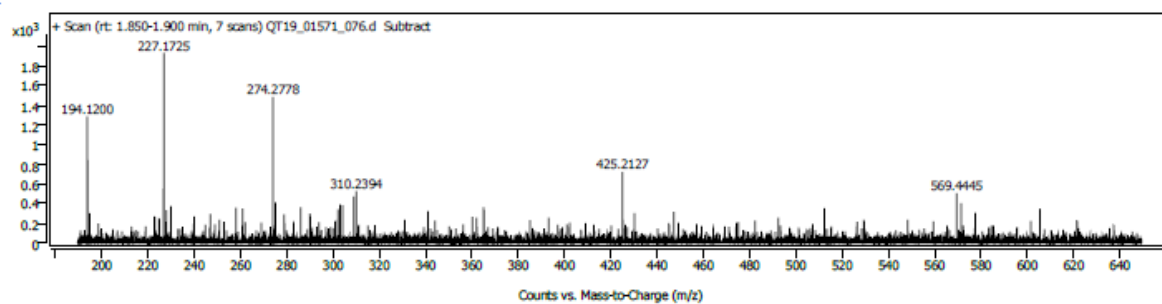



# Compound 6

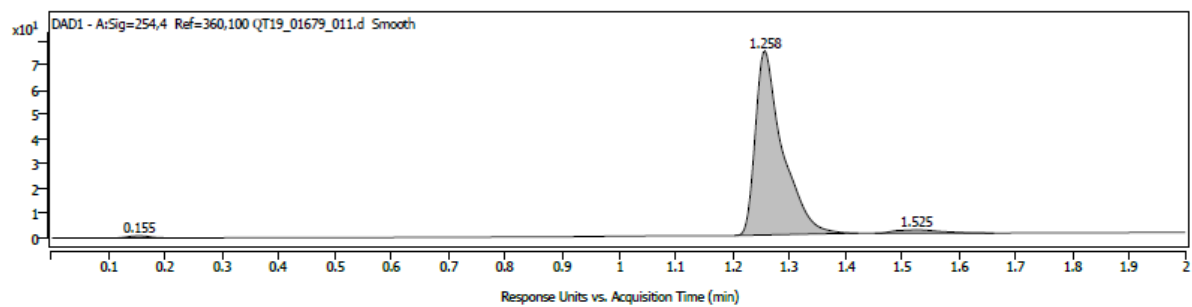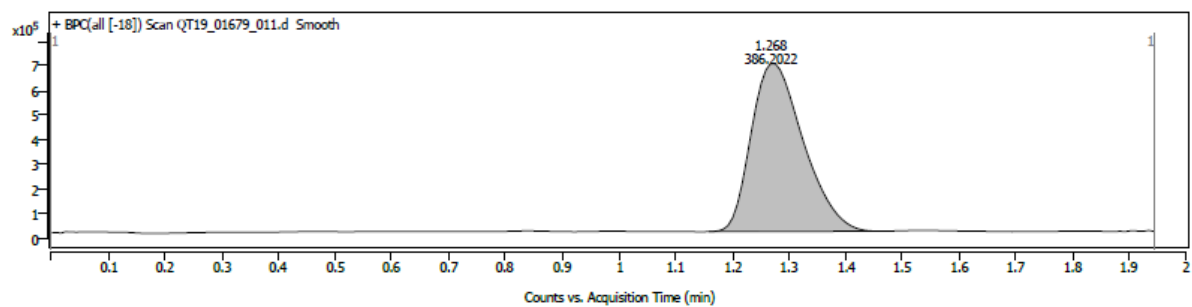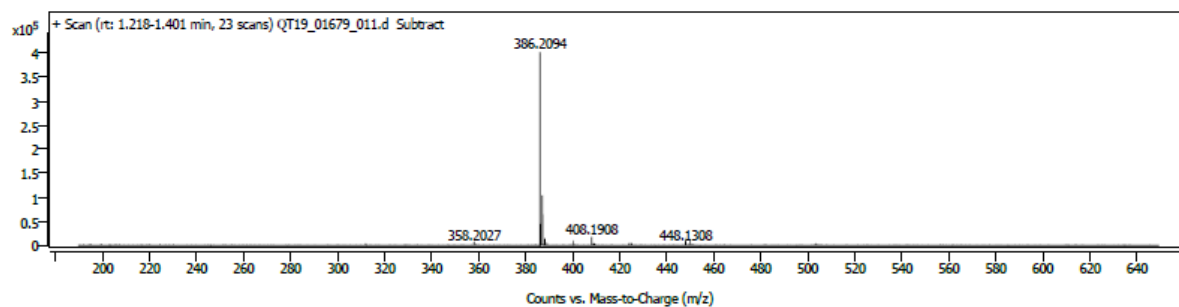

# Compound 7

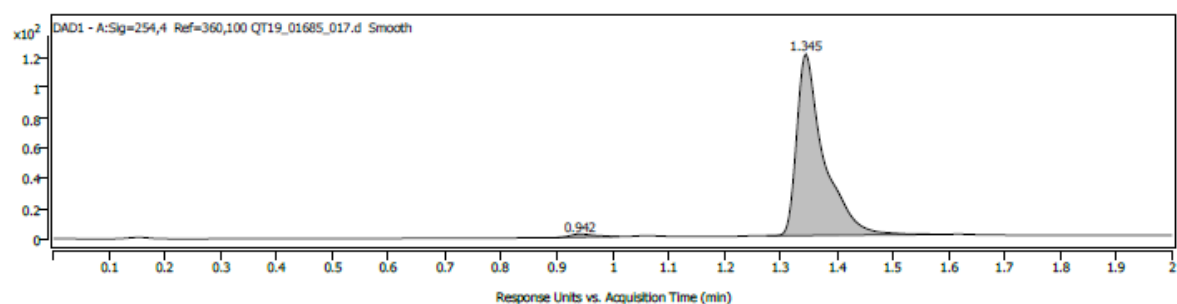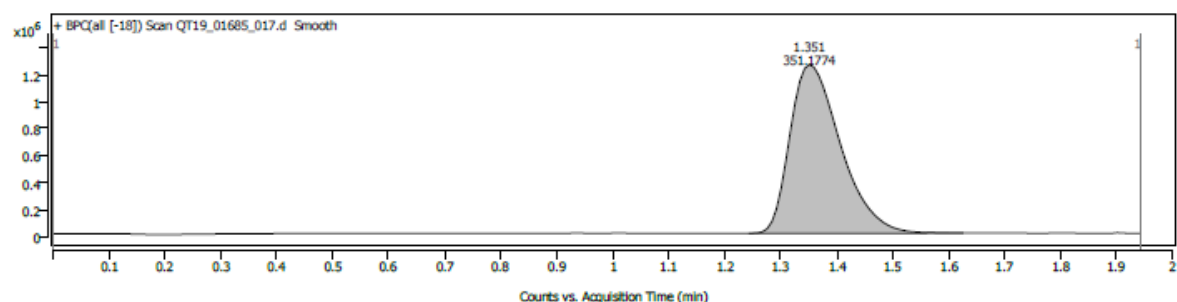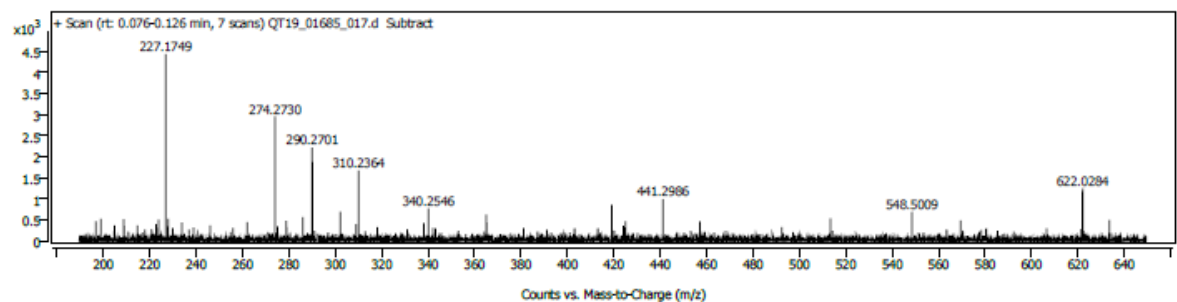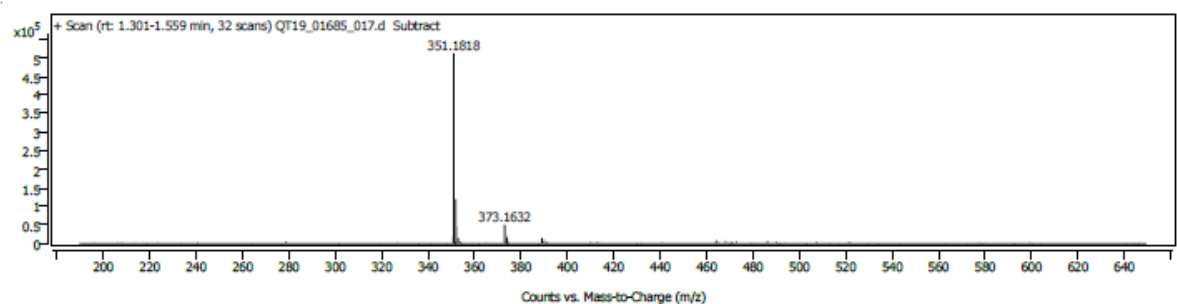

## Compound 8

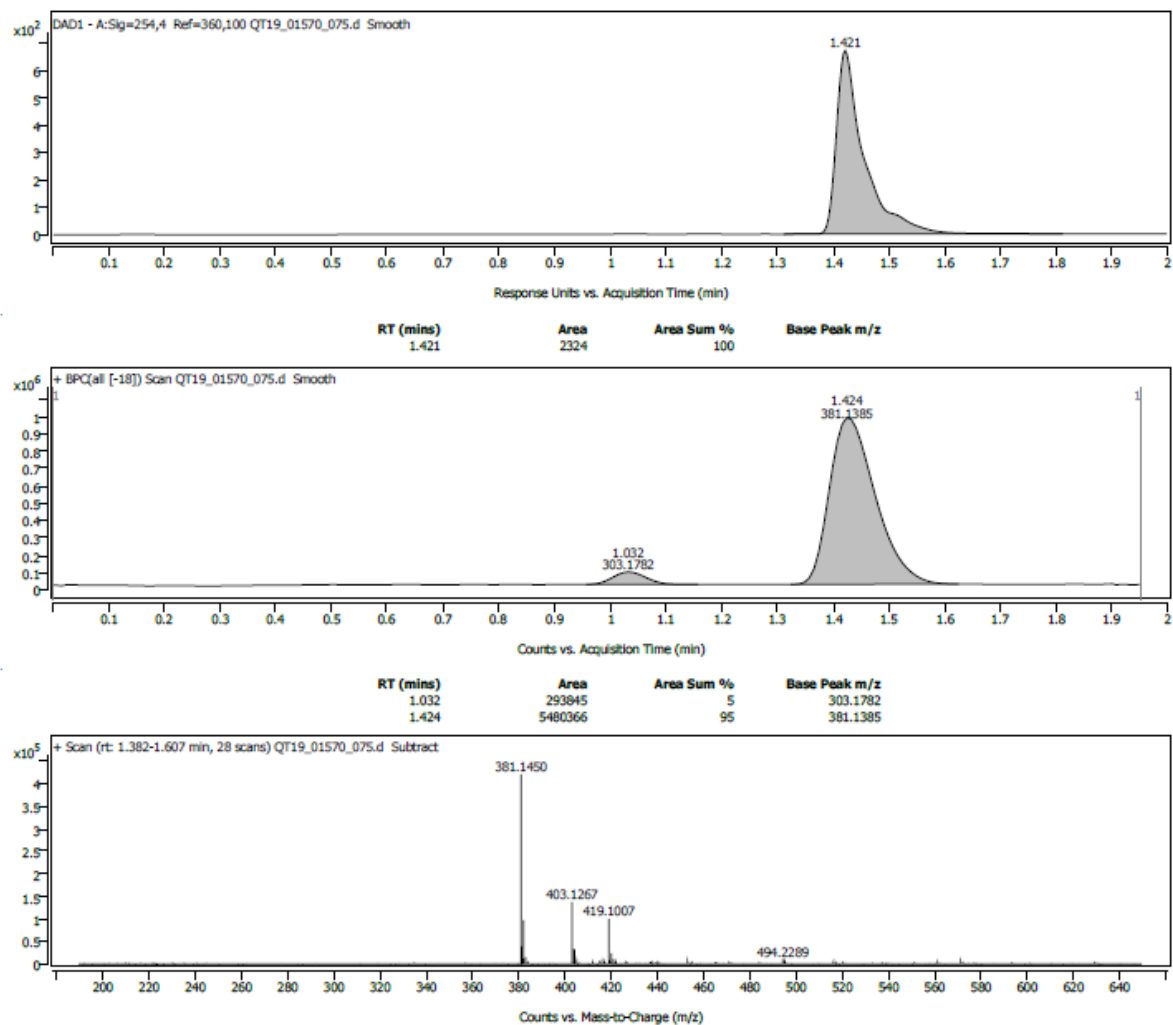

Supplementary Figure S14: LC-MS spectra for compounds 1 – 8.

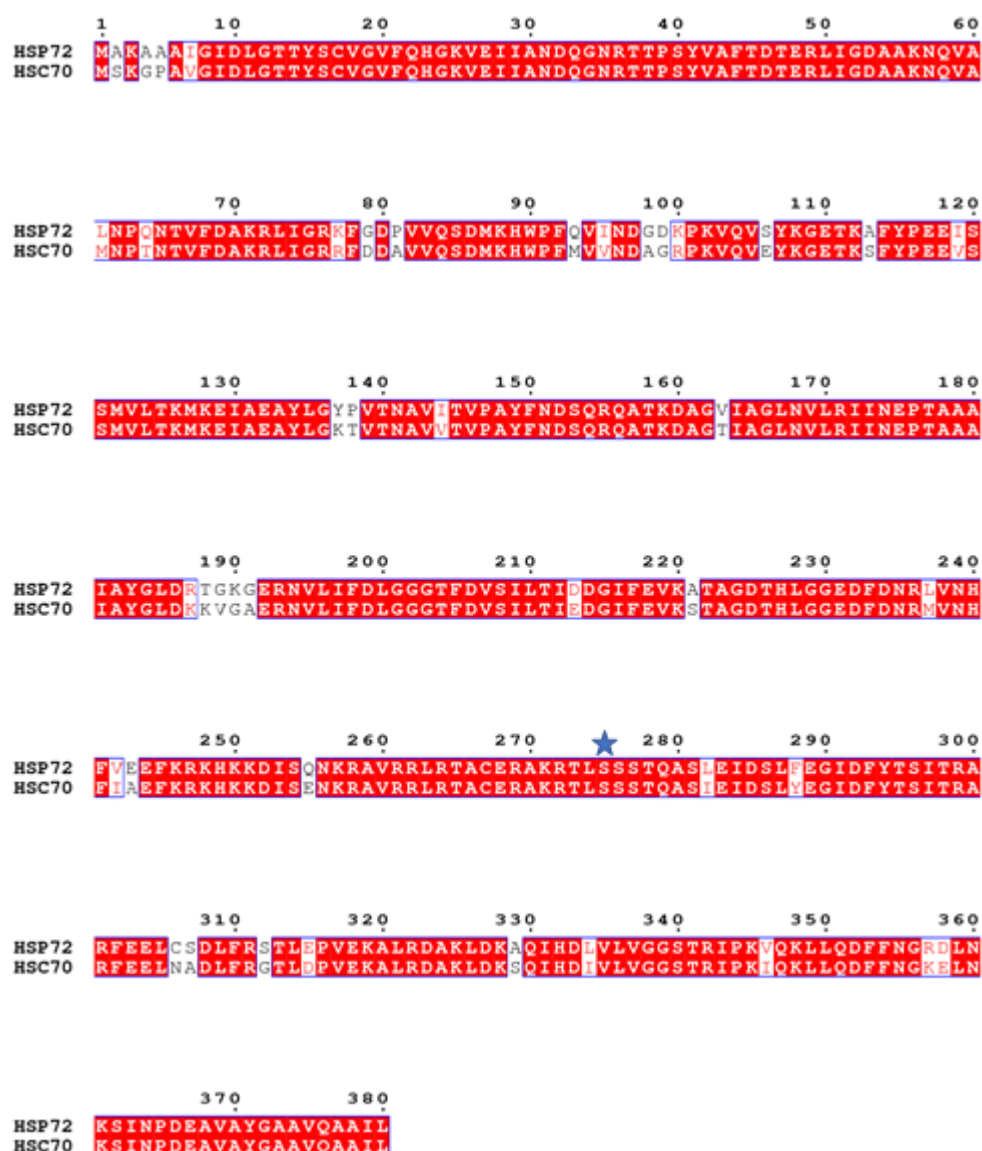

**Supplementary Figure S15:** Sequence alignment of the nucleotide binding domains of human HSP72 and HSC70 proteins. Identical residues are shown in white font on a red background and similar residues in red font on a white background. Residue S275, crucial for the binding of the adenine ring of ATP, is highlighted with a blue star. Sequence identity is 85.1 % on the full-length proteins, rising to 88.7 % for the nucleotide binding domains only (residues 1 to 380 of both proteins), and to 100 % for the residues coating the ATP binding site and/or the binding site of compound **1** (residues 201-204, 229-231, 267-276, 299-303, 339-345 and 366). The sequence alignment was performed with Clustal Omega and its visual representation with ESript 3.0.

| Multiplet | NN | Range      | Abs. Integral | Concentration | SNR       |
|-----------|----|------------|---------------|---------------|-----------|
| A(d)      | 2  | 7.81..7.72 | 6942472.5126  | 297.2180      | 1012.0886 |
| B(t)      | 2  | 7.44..7.38 | 6939013.8658  | 297.0699      | 1076.0009 |
| C(t)      | 1  | 7.37..7.31 | 3259444.4027  | 279.0837      | 525.9891  |

Concentration Average: 291.1239 uM  
RMSD%: 2.9245

Department Chemistry — ID CCT240677-2 in PBS — @qHNMR3\_bua 3mm\_H2O+D2O {C:\Bruker} tmchar

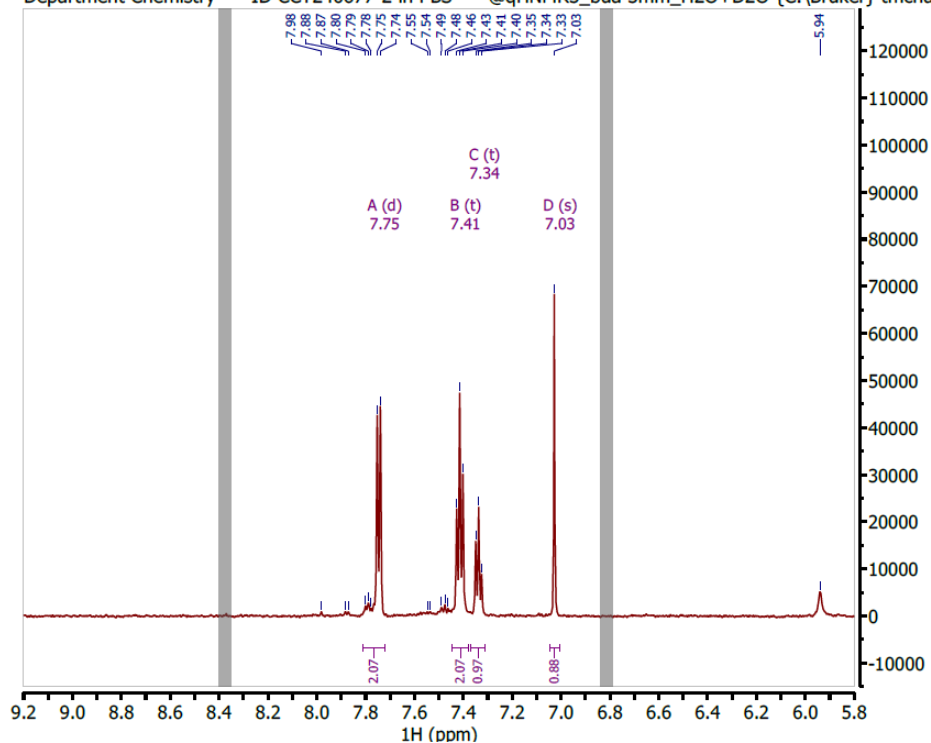

| Parameter              | Value                                    |
|------------------------|------------------------------------------|
| Title                  | TFFM-5208-005-CCT240677-2.10.fid         |
| Solvent                | 3mm_H2O+D2O                              |
| Temperature            | 298.0                                    |
| Pulse Sequence         | ic1pmpgpf2                               |
| Probe                  | Z75812_0002 (CP TCI 60053 H-C/ N-D-05 Z) |
| Number of Scans        | 32                                       |
| Receiver Gain          | 101.0                                    |
| Relaxation Delay       | 20.0000                                  |
| Acquisition Date       | 2019-06-22T15:12:21                      |
| Spectrometer Frequency | 600.14                                   |

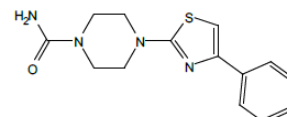

Supplementary Figure S16: Determination of pH 7.4 phosphate buffer solubility of **1** by quantitative NMR.

**Supplementary Table S1.** Observed changes in NMR signal intensities for **3** on addition of HSP72-NBD and ATP.<sup>1</sup>

| Conditions                 | Peak a | Peak b | Peak c |
|----------------------------|--------|--------|--------|
| <b>3</b> + HSP72-NBD       | 41%    | 36%    | 31%    |
| <b>3</b> + HSP72-NBD + ATP | 5%     | 22%    | 7%     |

<sup>1</sup> Quantified from the data shown in Supplementary Figure S4 using MestreNova

**Supplementary Table S2.** LC-MS data to confirm the identity and purity of vHTS hits **4 – 8**.

| <b>Compound</b> | <b>Mass detected</b>     | <b>Purity (UV)</b> |
|-----------------|--------------------------|--------------------|
| <b>4</b>        | 369.1 (M+H) <sup>+</sup> | 94%                |
| <b>5</b>        | 361.2 (M+H) <sup>+</sup> | 100%               |
| <b>6</b>        | 386.2 (M+H) <sup>+</sup> | 96%                |
| <b>7</b>        | 351.2 (M+H) <sup>+</sup> | 98%                |
| <b>8</b>        | 381.1 (M+H) <sup>+</sup> | 100%               |

**Supplementary Table S3:** Crystallographic data collection and refinement statistics for **1**-HSP72-NBD.

|                                           |                                                |
|-------------------------------------------|------------------------------------------------|
| Protein construct                         | HSP72 1-380                                    |
| Ligand                                    | <b>1</b>                                       |
| PDB code                                  | 7Q4R                                           |
| <i>Crystal</i>                            |                                                |
| Space group                               | P 2 <sub>1</sub> 2 <sub>1</sub> 2 <sub>1</sub> |
| Unit cell dimensions (a/b/c in Å)         | 47.47/78.47/93.50                              |
| Unit cell angles (α/β/γ in °)             | 90/90/90                                       |
| <i>Data collection and processing</i>     |                                                |
| Beamline                                  | DLS I24                                        |
| Wavelength (Å)                            | 0.9686                                         |
| Integration program                       | XDS                                            |
| Reduction program                         | AIMLESS                                        |
| Resolution range                          | 47.47 – 1.79                                   |
| Number of unique reflections <sup>a</sup> | 32590 (1470)                                   |
| Completeness <sup>a</sup>                 | 96.8 (75)                                      |
| Redundancy <sup>a</sup>                   | 5.5 (3.4)                                      |
| R <sub>merge</sub> (%) <sup>a</sup>       | 5.9 (37.7)                                     |
| I/σ(I) <sup>a</sup>                       | 15.7 (2.2)                                     |
| CC <sub>1/2</sub> <sup>a, b</sup>         | 0.999 (0.864)                                  |
| <i>Refinement</i>                         |                                                |
| Program                                   | BUSTER                                         |
| R <sub>work</sub> (%)                     | 19.17                                          |
| R <sub>free</sub> (%)                     | 23.49                                          |
| Number of residues                        | 383                                            |
| Number of water molecules                 | 409                                            |
| Average B-factor (Å <sup>2</sup> )        | 26.30                                          |
| Ramachandran favoured (%)                 | 100                                            |
| Ramachandran outliers (%)                 | 0                                              |
| RMSD bonds (Å)                            | 0.012                                          |
| RMSD angles (°)                           | 1.496                                          |

<sup>a</sup> Values in parentheses are for the highest resolution shell; <sup>b</sup> Half-dataset correlation coefficient [1].

## Reference

1. Karplus, P.A.; Diederichs, K. Linking crystallographic model and data quality. *Science* **2012**, *336*, 1030–1033. <https://doi.org/10.1126/science.1218231>.
